# Supplementary material
Source: publisher figshare collection journal article supplement (https://karger.figshare.com/articles/dataset/_/5120989)
Supplement: Supplementary file 1 [file 1]

Table S1. Organisms included in this study.

| Phylum                | Class                 | Order                   | Family                    | Microorganism <sup>1</sup>                                             |
|-----------------------|-----------------------|-------------------------|---------------------------|------------------------------------------------------------------------|
| <i>Acidobacteria</i>  | <i>Acidobacteria</i>  | <i>Acidobacteriales</i> | <i>Acidobacteriaceae</i>  | <i>Acidobacteria bacterium</i> Ellin345                                |
| <i>Acidobacteria</i>  | <i>Solibacteres</i>   | <i>Solibacterales</i>   | <i>Solibacteraceae</i>    | <i>Solibacter usitatus</i> Ellin6076                                   |
| <i>Actinobacteria</i> | <i>Actinobacteria</i> | <i>Actinomycetales</i>  | <i>Acidothermaceae</i>    | <i>Acidothermus cellulolyticus</i> 11B                                 |
| <i>Actinobacteria</i> | <i>Actinobacteria</i> | <i>Actinomycetales</i>  | <i>Cellulomonadaceae</i>  | <i>Tropheryma whipplei</i> str. Twist                                  |
| <i>Actinobacteria</i> | <i>Actinobacteria</i> | <i>Actinomycetales</i>  | <i>Cellulomonadaceae</i>  | <i>Tropheryma whipplei</i> TW08/27                                     |
| <i>Actinobacteria</i> | <i>Actinobacteria</i> | <i>Actinomycetales</i>  | <i>Corynebacteriaceae</i> | <i>Corynebacterium diphtheriae</i> NCTC 13129                          |
| <i>Actinobacteria</i> | <i>Actinobacteria</i> | <i>Actinomycetales</i>  | <i>Corynebacteriaceae</i> | <i>Corynebacterium efficiens</i> YS-314 *                              |
| <i>Actinobacteria</i> | <i>Actinobacteria</i> | <i>Actinomycetales</i>  | <i>Corynebacteriaceae</i> | <i>Corynebacterium glutamicum</i> ATCC 13032                           |
| <i>Actinobacteria</i> | <i>Actinobacteria</i> | <i>Actinomycetales</i>  | <i>Corynebacteriaceae</i> | <i>Corynebacterium glutamicum</i> R                                    |
| <i>Actinobacteria</i> | <i>Actinobacteria</i> | <i>Actinomycetales</i>  | <i>Corynebacteriaceae</i> | <i>Corynebacterium jeikeium</i> K411                                   |
| <i>Actinobacteria</i> | <i>Actinobacteria</i> | <i>Actinomycetales</i>  | <i>Frankiaceae</i>        | <i>Frankia alni</i> ACN14a                                             |
| <i>Actinobacteria</i> | <i>Actinobacteria</i> | <i>Actinomycetales</i>  | <i>Frankiaceae</i>        | <i>Frankia</i> sp. CcI3                                                |
| <i>Actinobacteria</i> | <i>Actinobacteria</i> | <i>Actinomycetales</i>  | <i>Frankiaceae</i>        | <i>Frankia</i> sp. EAN1pec                                             |
| <i>Actinobacteria</i> | <i>Actinobacteria</i> | <i>Actinomycetales</i>  | <i>Kineosporiaceae</i>    | <i>Kineococcus radiotolerans</i> SRS30216                              |
| <i>Actinobacteria</i> | <i>Actinobacteria</i> | <i>Actinomycetales</i>  | <i>Microbacteriaceae</i>  | <i>Clavibacter michiganensis</i> subsp. <i>michiganensis</i> NCPPB 382 |
| <i>Actinobacteria</i> | <i>Actinobacteria</i> | <i>Actinomycetales</i>  | <i>Microbacteriaceae</i>  | <i>Leifsonia xyli</i> subsp. <i>xyli</i> str. CTCB07                   |
| <i>Actinobacteria</i> | <i>Actinobacteria</i> | <i>Actinomycetales</i>  | <i>Micrococcaceae</i>     | <i>Arthrobacter aurescens</i> TC1                                      |
| <i>Actinobacteria</i> | <i>Actinobacteria</i> | <i>Actinomycetales</i>  | <i>Micrococcaceae</i>     | <i>Arthrobacter</i> sp. FB24                                           |
| <i>Actinobacteria</i> | <i>Actinobacteria</i> | <i>Actinomycetales</i>  | <i>Micromonosporaceae</i> | <i>Salinispora tropica</i> CNB-440                                     |
| <i>Actinobacteria</i> | <i>Actinobacteria</i> | <i>Actinomycetales</i>  | <i>Mycobacteriaceae</i>   | <i>Mycobacterium avium</i> 104                                         |
| <i>Actinobacteria</i> | <i>Actinobacteria</i> | <i>Actinomycetales</i>  | <i>Mycobacteriaceae</i>   | <i>Mycobacterium avium</i> subsp. <i>paratuberculosis</i> K-10         |
| <i>Actinobacteria</i> | <i>Actinobacteria</i> | <i>Actinomycetales</i>  | <i>Mycobacteriaceae</i>   | <i>Mycobacterium bovis</i> AF2122/97                                   |
| <i>Actinobacteria</i> | <i>Actinobacteria</i> | <i>Actinomycetales</i>  | <i>Mycobacteriaceae</i>   | <i>Mycobacterium bovis</i> BCG str. Pasteur 1173P2                     |
| <i>Actinobacteria</i> | <i>Actinobacteria</i> | <i>Actinomycetales</i>  | <i>Mycobacteriaceae</i>   | <i>Mycobacterium gilvum</i> PYR-GCK                                    |
| <i>Actinobacteria</i> | <i>Actinobacteria</i> | <i>Actinomycetales</i>  | <i>Mycobacteriaceae</i>   | <i>Mycobacterium leprae</i> TN                                         |
| <i>Actinobacteria</i> | <i>Actinobacteria</i> | <i>Actinomycetales</i>  | <i>Mycobacteriaceae</i>   | <i>Mycobacterium smegmatis</i> str. MC2 155                            |
| <i>Actinobacteria</i> | <i>Actinobacteria</i> | <i>Actinomycetales</i>  | <i>Mycobacteriaceae</i>   | <i>Mycobacterium</i> sp. JLS                                           |
| <i>Actinobacteria</i> | <i>Actinobacteria</i> | <i>Actinomycetales</i>  | <i>Mycobacteriaceae</i>   | <i>Mycobacterium</i> sp. KMS                                           |
| <i>Actinobacteria</i> | <i>Actinobacteria</i> | <i>Actinomycetales</i>  | <i>Mycobacteriaceae</i>   | <i>Mycobacterium</i> sp. MCS                                           |
| <i>Actinobacteria</i> | <i>Actinobacteria</i> | <i>Actinomycetales</i>  | <i>Mycobacteriaceae</i>   | <i>Mycobacterium tuberculosis</i> CDC1551                              |

|                       |                        |                           |                            |                                                |
|-----------------------|------------------------|---------------------------|----------------------------|------------------------------------------------|
| <i>Actinobacteria</i> | <i>Actinobacteria</i>  | <i>Actinomycetales</i>    | <i>Mycobacteriaceae</i>    | <i>Mycobacterium tuberculosis</i> F11          |
| <i>Actinobacteria</i> | <i>Actinobacteria</i>  | <i>Actinomycetales</i>    | <i>Mycobacteriaceae</i>    | <i>Mycobacterium tuberculosis</i> H37Ra        |
| <i>Actinobacteria</i> | <i>Actinobacteria</i>  | <i>Actinomycetales</i>    | <i>Mycobacteriaceae</i>    | <i>Mycobacterium tuberculosis</i> H37Rv        |
| <i>Actinobacteria</i> | <i>Actinobacteria</i>  | <i>Actinomycetales</i>    | <i>Mycobacteriaceae</i>    | <i>Mycobacterium ulcerans</i> Agy99            |
| <i>Actinobacteria</i> | <i>Actinobacteria</i>  | <i>Actinomycetales</i>    | <i>Mycobacteriaceae</i>    | <i>Mycobacterium vanbaalenii</i> PYR-1         |
| <i>Actinobacteria</i> | <i>Actinobacteria</i>  | <i>Actinomycetales</i>    | <i>Nocardiaceae</i>        | <i>Nocardia farcinica</i> IFM 10152            |
| <i>Actinobacteria</i> | <i>Actinobacteria</i>  | <i>Actinomycetales</i>    | <i>Nocardiaceae</i>        | <i>Rhodococcus</i> sp. RHA1                    |
| <i>Actinobacteria</i> | <i>Actinobacteria</i>  | <i>Actinomycetales</i>    | <i>Nocardioidaceae</i>     | <i>Nocardioides</i> sp. JS614                  |
| <i>Actinobacteria</i> | <i>Actinobacteria</i>  | <i>Actinomycetales</i>    | <i>Nocardiopsaceae</i>     | <i>Thermobifida fusca</i> YX                   |
| <i>Actinobacteria</i> | <i>Actinobacteria</i>  | <i>Actinomycetales</i>    | <i>Propionibacterineae</i> | <i>Propionibacterium acnes</i> KPA171202       |
| <i>Actinobacteria</i> | <i>Actinobacteria</i>  | <i>Actinomycetales</i>    | <i>Pseudonocardiaceae</i>  | <i>Saccharopolyspora erythraea</i> NRRL 2338   |
| <i>Actinobacteria</i> | <i>Actinobacteria</i>  | <i>Actinomycetales</i>    | <i>Streptomycetaceae</i>   | <i>Streptomyces avermitilis</i> MA-4680        |
| <i>Actinobacteria</i> | <i>Actinobacteria</i>  | <i>Actinomycetales</i>    | <i>Streptomycetaceae</i>   | <i>Streptomyces coelicolor</i> A3(2)           |
| <i>Actinobacteria</i> | <i>Actinobacteria</i>  | <i>Bifidobacteriales</i>  | <i>Bifidobacteriaceae</i>  | <i>Bifidobacterium adolescentis</i> ATCC 15703 |
| <i>Actinobacteria</i> | <i>Actinobacteria</i>  | <i>Bifidobacteriales</i>  | <i>Bifidobacteriaceae</i>  | <i>Bifidobacterium longum</i> NCC2705          |
| <i>Actinobacteria</i> | <i>Actinobacteria</i>  | <i>Rubrobacterales</i>    | <i>Rubrobacteraceae</i>    | <i>Rubrobacter xylanophilus</i> DSM 9941       |
| <i>Aquificae</i>      | <i>Aquificae</i>       | <i>Aquificales</i>        | <i>Aquificaceae</i>        | <i>Aquifex aeolicus</i> VF5                    |
| <i>Bacteroidetes</i>  | <i>Bacteroidia</i>     | <i>Bacteroidales</i>      | <i>Bacteroidaceae</i>      | <i>Bacteroides fragilis</i> NCTC 9343          |
| <i>Bacteroidetes</i>  | <i>Bacteroidia</i>     | <i>Bacteroidales</i>      | <i>Bacteroidaceae</i>      | <i>Bacteroides fragilis</i> YCH46              |
| <i>Bacteroidetes</i>  | <i>Bacteroidia</i>     | <i>Bacteroidales</i>      | <i>Bacteroidaceae</i>      | <i>Bacteroides thetaiotaomicron</i> VPI-5482   |
| <i>Bacteroidetes</i>  | <i>Bacteroidia</i>     | <i>Bacteroidales</i>      | <i>Bacteroidaceae</i>      | <i>Bacteroides vulgatus</i> ATCC 8482          |
| <i>Bacteroidetes</i>  | <i>Bacteroidia</i>     | <i>Bacteroidales</i>      | <i>Porphyromonadaceae</i>  | <i>Parabacteroides distasonis</i> ATCC 8503    |
| <i>Bacteroidetes</i>  | <i>Bacteroidia</i>     | <i>Bacteroidales</i>      | <i>Porphyromonadaceae</i>  | <i>Porphyromonas gingivalis</i> W83            |
| <i>Bacteroidetes</i>  | <i>Flavobacteria</i>   | <i>Flavobacteriales</i>   | <i>Flavobacteriaceae</i>   | <i>Flavobacterium johnsoniae</i> UW101         |
| <i>Bacteroidetes</i>  | <i>Flavobacteria</i>   | <i>Flavobacteriales</i>   | <i>Flavobacteriaceae</i>   | <i>Flavobacterium psychrophilum</i> JIP02/86   |
| <i>Bacteroidetes</i>  | <i>Flavobacteria</i>   | <i>Flavobacteriales</i>   | <i>Flavobacteriaceae</i>   | <i>Gramella forsetii</i> KT0803                |
| <i>Bacteroidetes</i>  | <i>Sphingobacteria</i> | <i>Sphingobacteriales</i> | -                          | <i>Salinibacter ruber</i> DSM 13855            |
| <i>Bacteroidetes</i>  | <i>Sphingobacteria</i> | <i>Sphingobacteriales</i> | <i>Flexibacteraceae</i>    | <i>Cytophaga hutchinsonii</i> ATCC 33406       |
| <i>Chlamydiae</i>     | <i>Chlamydiae</i>      | <i>Chlamydiales</i>       | <i>Chlamydiaceae</i>       | <i>Chlamydia muridarum</i> Nigg                |
| <i>Chlamydiae</i>     | <i>Chlamydiae</i>      | <i>Chlamydiales</i>       | <i>Chlamydiaceae</i>       | <i>Chlamydia trachomatis</i> A/HAR-13          |
| <i>Chlamydiae</i>     | <i>Chlamydiae</i>      | <i>Chlamydiales</i>       | <i>Chlamydiaceae</i>       | <i>Chlamydia trachomatis</i> D/UW-3/CX         |
| <i>Chlamydiae</i>     | <i>Chlamydiae</i>      | <i>Chlamydiales</i>       | <i>Chlamydiaceae</i>       | <i>Chlamydophila abortus</i> S26/3             |

|                      |                          |                        |                          |                                                    |
|----------------------|--------------------------|------------------------|--------------------------|----------------------------------------------------|
| <i>Chlamydiae</i>    | <i>Chlamydiae</i>        | <i>Chlamydiales</i>    | <i>Chlamydiaceae</i>     | <i>Chlamydophila caviae</i> GPIC                   |
| <i>Chlamydiae</i>    | <i>Chlamydiae</i>        | <i>Chlamydiales</i>    | <i>Chlamydiaceae</i>     | <i>Chlamydophila felis</i> Fe/C-56                 |
| <i>Chlamydiae</i>    | <i>Chlamydiae</i>        | <i>Chlamydiales</i>    | <i>Chlamydiaceae</i>     | <i>Chlamydophila pneumoniae</i> AR39               |
| <i>Chlamydiae</i>    | <i>Chlamydiae</i>        | <i>Chlamydiales</i>    | <i>Chlamydiaceae</i>     | <i>Chlamydophila pneumoniae</i> CWL029             |
| <i>Chlamydiae</i>    | <i>Chlamydiae</i>        | <i>Chlamydiales</i>    | <i>Chlamydiaceae</i>     | <i>Chlamydophila pneumoniae</i> J138               |
| <i>Chlamydiae</i>    | <i>Chlamydiae</i>        | <i>Chlamydiales</i>    | <i>Chlamydiaceae</i>     | <i>Chlamydophila pneumoniae</i> TW-183             |
| <i>Chlamydiae</i>    | <i>Chlamydiae</i>        | <i>Chlamydiales</i>    | <i>Parachlamydiaceae</i> | <i>Candidatus Protochlamydia amoebophila</i> UWE25 |
| <i>Chlorobi</i>      | <i>Chlorobia</i>         | <i>Chlorobiales</i>    | <i>Chlorobiaceae</i>     | <i>Chlorobium chlorochromatii</i> CaD3             |
| <i>Chlorobi</i>      | <i>Chlorobia</i>         | <i>Chlorobiales</i>    | <i>Chlorobiaceae</i>     | <i>Chlorobium phaeobacteroides</i> DSM 266         |
| <i>Chlorobi</i>      | <i>Chlorobia</i>         | <i>Chlorobiales</i>    | <i>Chlorobiaceae</i>     | <i>Chlorobium phaeovibrioides</i> DSM 265          |
| <i>Chlorobi</i>      | <i>Chlorobia</i>         | <i>Chlorobiales</i>    | <i>Chlorobiaceae</i>     | <i>Chlorobium tepidum</i> TLS                      |
| <i>Chlorobi</i>      | <i>Chlorobia</i>         | <i>Chlorobiales</i>    | <i>Chlorobiaceae</i>     | <i>Pelodictyon luteolum</i> DSM 273                |
| <i>Chloroflexi</i>   | <i>Chloroflexi</i>       | <i>Chloroflexales</i>  | <i>Chloroflexaceae</i>   | <i>Roseiflexus castenholzii</i> DSM 13941          |
| <i>Chloroflexi</i>   | <i>Chloroflexi</i>       | <i>Chloroflexales</i>  | <i>Chloroflexaceae</i>   | <i>Roseiflexus</i> sp. RS-1                        |
| <i>Chloroflexi</i>   | <i>Dehalococcoidetes</i> | -                      | -                        | <i>Dehalococcoides ethenogenes</i> 195             |
| <i>Chloroflexi</i>   | <i>Dehalococcoidetes</i> | -                      | -                        | <i>Dehalococcoides</i> sp. BAV1                    |
| <i>Chloroflexi</i>   | <i>Dehalococcoidetes</i> | -                      | -                        | <i>Dehalococcoides</i> sp. CBDB1                   |
| <i>Cyanobacteria</i> | -                        | <i>Chroococcales</i>   | -                        | <i>Synechococcus elongatus</i> PCC 6301            |
| <i>Cyanobacteria</i> | -                        | <i>Chroococcales</i>   | -                        | <i>Synechococcus elongatus</i> PCC 7942            |
| <i>Cyanobacteria</i> | -                        | <i>Chroococcales</i>   | -                        | <i>Synechococcus</i> sp. CC9311                    |
| <i>Cyanobacteria</i> | -                        | <i>Chroococcales</i>   | -                        | <i>Synechococcus</i> sp. CC9605                    |
| <i>Cyanobacteria</i> | -                        | <i>Chroococcales</i>   | -                        | <i>Synechococcus</i> sp. CC9902                    |
| <i>Cyanobacteria</i> | -                        | <i>Chroococcales</i>   | -                        | <i>Synechococcus</i> sp. JA-2-3B'a(2-13)           |
| <i>Cyanobacteria</i> | -                        | <i>Chroococcales</i>   | -                        | <i>Synechococcus</i> sp. JA-3-3Ab                  |
| <i>Cyanobacteria</i> | -                        | <i>Chroococcales</i>   | -                        | <i>Synechococcus</i> sp. RCC307                    |
| <i>Cyanobacteria</i> | -                        | <i>Chroococcales</i>   | -                        | <i>Synechococcus</i> sp. WH 7803                   |
| <i>Cyanobacteria</i> | -                        | <i>Chroococcales</i>   | -                        | <i>Synechococcus</i> sp. WH 8102                   |
| <i>Cyanobacteria</i> | -                        | <i>Chroococcales</i>   | -                        | <i>Synechocystis</i> sp. PCC 6803                  |
| <i>Cyanobacteria</i> | -                        | <i>Chroococcales</i>   | -                        | <i>Thermosynechococcus elongatus</i> BP-1          |
| <i>Cyanobacteria</i> | -                        | <i>Nostocales</i>      | <i>Nostocaceae</i>       | <i>Anabaena variabilis</i> ATCC 29413              |
| <i>Cyanobacteria</i> | -                        | <i>Nostocales</i>      | <i>Nostocaceae</i>       | <i>Nostoc</i> sp. PCC 7120                         |
| <i>Cyanobacteria</i> | -                        | <i>Oscillatoriales</i> | -                        | <i>Trichodesmium erythraeum</i> IMS101             |

|                            |                                       |                        |                           |                                                                     |
|----------------------------|---------------------------------------|------------------------|---------------------------|---------------------------------------------------------------------|
| <i>Cyanobacteria</i>       | <i>Gloeobacteria</i>                  | <i>Gloeobacterales</i> | -                         | <i>Gloeobacter violaceus</i> PCC 7421                               |
| <i>Cyanobacteria</i>       |                                       | <i>Prochlorales</i>    | <i>Prochlorococcaceae</i> | <i>Prochlorococcus marinus</i> str. AS9601                          |
| <i>Cyanobacteria</i>       |                                       | <i>Prochlorales</i>    | <i>Prochlorococcaceae</i> | <i>Prochlorococcus marinus</i> str. MIT 9215                        |
| <i>Cyanobacteria</i>       |                                       | <i>Prochlorales</i>    | <i>Prochlorococcaceae</i> | <i>Prochlorococcus marinus</i> str. MIT 9301                        |
| <i>Cyanobacteria</i>       |                                       | <i>Prochlorales</i>    | <i>Prochlorococcaceae</i> | <i>Prochlorococcus marinus</i> str. MIT 9303                        |
| <i>Cyanobacteria</i>       |                                       | <i>Prochlorales</i>    | <i>Prochlorococcaceae</i> | <i>Prochlorococcus marinus</i> str. MIT 9312                        |
| <i>Cyanobacteria</i>       |                                       | <i>Prochlorales</i>    | <i>Prochlorococcaceae</i> | <i>Prochlorococcus marinus</i> str. MIT 9313                        |
| <i>Cyanobacteria</i>       |                                       | <i>Prochlorales</i>    | <i>Prochlorococcaceae</i> | <i>Prochlorococcus marinus</i> str. MIT 9515                        |
| <i>Cyanobacteria</i>       |                                       | <i>Prochlorales</i>    | <i>Prochlorococcaceae</i> | <i>Prochlorococcus marinus</i> str. NATL1A                          |
| <i>Cyanobacteria</i>       |                                       | <i>Prochlorales</i>    | <i>Prochlorococcaceae</i> | <i>Prochlorococcus marinus</i> str. NATL2A                          |
| <i>Cyanobacteria</i>       |                                       | <i>Prochlorales</i>    | <i>Prochlorococcaceae</i> | <i>Prochlorococcus marinus</i> subsp. <i>marinus</i> str. CCMP1375  |
| <i>Cyanobacteria</i>       |                                       | <i>Prochlorales</i>    | <i>Prochlorococcaceae</i> | <i>Prochlorococcus marinus</i> subsp. <i>pastoris</i> str. CCMP1986 |
| <i>Cyanobacteria</i>       | <i>unclassified<br/>Cyanobacteria</i> | -                      | -                         | <i>Acaryochloris marina</i> MBIC11017                               |
| <i>Deinococcus-Thermus</i> | <i>Deinococci</i>                     | <i>Deinococcales</i>   | <i>Deinococcaceae</i>     | <i>Deinococcus geothermalis</i> DSM 11300                           |
| <i>Deinococcus-Thermus</i> | <i>Deinococci</i>                     | <i>Deinococcales</i>   | <i>Deinococcaceae</i>     | <i>Deinococcus radiodurans</i> R1                                   |
| <i>Deinococcus-Thermus</i> | <i>Deinococci</i>                     | <i>Thermales</i>       | <i>Thermaceae</i>         | <i>Thermus thermophilus</i> HB27                                    |
| <i>Deinococcus-Thermus</i> | <i>Deinococci</i>                     | <i>Thermales</i>       | <i>Thermaceae</i>         | <i>Thermus thermophilus</i> HB8                                     |
| <i>Firmicutes</i>          | <i>Bacilli</i>                        | <i>Bacillales</i>      | <i>Bacillaceae</i>        | <i>Bacillus amyloliquefaciens</i> FZB42                             |
| <i>Firmicutes</i>          | <i>Bacilli</i>                        | <i>Bacillales</i>      | <i>Bacillaceae</i>        | <i>Bacillus anthracis</i> str. Ames                                 |
| <i>Firmicutes</i>          | <i>Bacilli</i>                        | <i>Bacillales</i>      | <i>Bacillaceae</i>        | <i>Bacillus anthracis</i> str. 'Ames Ancestor'                      |
| <i>Firmicutes</i>          | <i>Bacilli</i>                        | <i>Bacillales</i>      | <i>Bacillaceae</i>        | <i>Bacillus anthracis</i> str. Sterne                               |
| <i>Firmicutes</i>          | <i>Bacilli</i>                        | <i>Bacillales</i>      | <i>Bacillaceae</i>        | <i>Bacillus cereus</i> ATCC 10987                                   |
| <i>Firmicutes</i>          | <i>Bacilli</i>                        | <i>Bacillales</i>      | <i>Bacillaceae</i>        | <i>Bacillus cereus</i> ATCC 14579                                   |
| <i>Firmicutes</i>          | <i>Bacilli</i>                        | <i>Bacillales</i>      | <i>Bacillaceae</i>        | <i>Bacillus cereus</i> E33L                                         |
| <i>Firmicutes</i>          | <i>Bacilli</i>                        | <i>Bacillales</i>      | <i>Bacillaceae</i>        | <i>Bacillus cereus</i> subsp. <i>cytotoxis</i> NVH 391-98           |
| <i>Firmicutes</i>          | <i>Bacilli</i>                        | <i>Bacillales</i>      | <i>Bacillaceae</i>        | <i>Bacillus clausii</i> KSM-K16                                     |
| <i>Firmicutes</i>          | <i>Bacilli</i>                        | <i>Bacillales</i>      | <i>Bacillaceae</i>        | <i>Bacillus halodurans</i> C-125                                    |
| <i>Firmicutes</i>          | <i>Bacilli</i>                        | <i>Bacillales</i>      | <i>Bacillaceae</i>        | <i>Bacillus licheniformis</i> ATCC 14580                            |
| <i>Firmicutes</i>          | <i>Bacilli</i>                        | <i>Bacillales</i>      | <i>Bacillaceae</i>        | <i>Bacillus pumilus</i> SAFR-032                                    |
| <i>Firmicutes</i>          | <i>Bacilli</i>                        | <i>Bacillales</i>      | <i>Bacillaceae</i>        | <i>Bacillus subtilis</i> subsp. <i>subtilis</i> str. 168            |
| <i>Firmicutes</i>          | <i>Bacilli</i>                        | <i>Bacillales</i>      | <i>Bacillaceae</i>        | <i>Bacillus thuringiensis</i> serovar <i>konkukian</i> str. 97-27   |
| <i>Firmicutes</i>          | <i>Bacilli</i>                        | <i>Bacillales</i>      | <i>Bacillaceae</i>        | <i>Bacillus thuringiensis</i> str. Al Hakam                         |

|                   |                |                        |                          |                                                                            |
|-------------------|----------------|------------------------|--------------------------|----------------------------------------------------------------------------|
| <i>Firmicutes</i> | <i>Bacilli</i> | <i>Bacillales</i>      | <i>Bacillaceae</i>       | <i>Geobacillus kaustophilus</i> HTA426                                     |
| <i>Firmicutes</i> | <i>Bacilli</i> | <i>Bacillales</i>      | <i>Bacillaceae</i>       | <i>Geobacillus thermodenitrificans</i> NG80-2                              |
| <i>Firmicutes</i> | <i>Bacilli</i> | <i>Bacillales</i>      | <i>Bacillaceae</i>       | <i>Oceanobacillus iheyensis</i> HTE831                                     |
| <i>Firmicutes</i> | <i>Bacilli</i> | <i>Bacillales</i>      | <i>Listeriaceae</i>      | <i>Listeria innocua</i> Clip11262                                          |
| <i>Firmicutes</i> | <i>Bacilli</i> | <i>Bacillales</i>      | <i>Listeriaceae</i>      | <i>Listeria monocytogenes</i> EGD-e                                        |
| <i>Firmicutes</i> | <i>Bacilli</i> | <i>Bacillales</i>      | <i>Listeriaceae</i>      | <i>Listeria monocytogenes</i> str. 4b F2365                                |
| <i>Firmicutes</i> | <i>Bacilli</i> | <i>Bacillales</i>      | <i>Listeriaceae</i>      | <i>Listeria welshimeri</i> serovar 6b str. SLCC5334                        |
| <i>Firmicutes</i> | <i>Bacilli</i> | <i>Bacillales</i>      | <i>Staphylococcaceae</i> | <i>Staphylococcus aureus</i> RF122                                         |
| <i>Firmicutes</i> | <i>Bacilli</i> | <i>Bacillales</i>      | <i>Staphylococcaceae</i> | <i>Staphylococcus aureus</i> subsp. <i>aureus</i> COL                      |
| <i>Firmicutes</i> | <i>Bacilli</i> | <i>Bacillales</i>      | <i>Staphylococcaceae</i> | <i>Staphylococcus aureus</i> subsp. <i>aureus</i> JH1                      |
| <i>Firmicutes</i> | <i>Bacilli</i> | <i>Bacillales</i>      | <i>Staphylococcaceae</i> | <i>Staphylococcus aureus</i> subsp. <i>aureus</i> JH9                      |
| <i>Firmicutes</i> | <i>Bacilli</i> | <i>Bacillales</i>      | <i>Staphylococcaceae</i> | <i>Staphylococcus aureus</i> subsp. <i>aureus</i> MRSA252                  |
| <i>Firmicutes</i> | <i>Bacilli</i> | <i>Bacillales</i>      | <i>Staphylococcaceae</i> | <i>Staphylococcus aureus</i> subsp. <i>aureus</i> MSSA476                  |
| <i>Firmicutes</i> | <i>Bacilli</i> | <i>Bacillales</i>      | <i>Staphylococcaceae</i> | <i>Staphylococcus aureus</i> subsp. <i>aureus</i> Mu3                      |
| <i>Firmicutes</i> | <i>Bacilli</i> | <i>Bacillales</i>      | <i>Staphylococcaceae</i> | <i>Staphylococcus aureus</i> subsp. <i>aureus</i> Mu50                     |
| <i>Firmicutes</i> | <i>Bacilli</i> | <i>Bacillales</i>      | <i>Staphylococcaceae</i> | <i>Staphylococcus aureus</i> subsp. <i>aureus</i> MW2                      |
| <i>Firmicutes</i> | <i>Bacilli</i> | <i>Bacillales</i>      | <i>Staphylococcaceae</i> | <i>Staphylococcus aureus</i> subsp. <i>aureus</i> N315                     |
| <i>Firmicutes</i> | <i>Bacilli</i> | <i>Bacillales</i>      | <i>Staphylococcaceae</i> | <i>Staphylococcus aureus</i> subsp. <i>aureus</i> NCTC 8325                |
| <i>Firmicutes</i> | <i>Bacilli</i> | <i>Bacillales</i>      | <i>Staphylococcaceae</i> | <i>Staphylococcus aureus</i> subsp. <i>aureus</i> str. Newman              |
| <i>Firmicutes</i> | <i>Bacilli</i> | <i>Bacillales</i>      | <i>Staphylococcaceae</i> | <i>Staphylococcus aureus</i> subsp. <i>aureus</i> USA300                   |
| <i>Firmicutes</i> | <i>Bacilli</i> | <i>Bacillales</i>      | <i>Staphylococcaceae</i> | <i>Staphylococcus epidermidis</i> ATCC 12228                               |
| <i>Firmicutes</i> | <i>Bacilli</i> | <i>Bacillales</i>      | <i>Staphylococcaceae</i> | <i>Staphylococcus epidermidis</i> RP62A                                    |
| <i>Firmicutes</i> | <i>Bacilli</i> | <i>Bacillales</i>      | <i>Staphylococcaceae</i> | <i>Staphylococcus haemolyticus</i> JCSC1435                                |
| <i>Firmicutes</i> | <i>Bacilli</i> | <i>Bacillales</i>      | <i>Staphylococcaceae</i> | <i>Staphylococcus saprophyticus</i> subsp. <i>saprophyticus</i> ATCC 15305 |
| <i>Firmicutes</i> | <i>Bacilli</i> | <i>Lactobacillales</i> | <i>Enterococcaceae</i>   | <i>Enterococcus faecalis</i> V583                                          |
| <i>Firmicutes</i> | <i>Bacilli</i> | <i>Lactobacillales</i> | <i>Lactobacillaceae</i>  | <i>Lactobacillus acidophilus</i> NCFM                                      |
| <i>Firmicutes</i> | <i>Bacilli</i> | <i>Lactobacillales</i> | <i>Lactobacillaceae</i>  | <i>Lactobacillus brevis</i> ATCC 367                                       |
| <i>Firmicutes</i> | <i>Bacilli</i> | <i>Lactobacillales</i> | <i>Lactobacillaceae</i>  | <i>Lactobacillus casei</i> ATCC 334                                        |
| <i>Firmicutes</i> | <i>Bacilli</i> | <i>Lactobacillales</i> | <i>Lactobacillaceae</i>  | <i>Lactobacillus delbrueckii</i> subsp. <i>bulgaricus</i> ATCC 11842       |
| <i>Firmicutes</i> | <i>Bacilli</i> | <i>Lactobacillales</i> | <i>Lactobacillaceae</i>  | <i>Lactobacillus delbrueckii</i> subsp. <i>bulgaricus</i> ATCC BAA-365     |
| <i>Firmicutes</i> | <i>Bacilli</i> | <i>Lactobacillales</i> | <i>Lactobacillaceae</i>  | <i>Lactobacillus gasseri</i> ATCC 33323                                    |
| <i>Firmicutes</i> | <i>Bacilli</i> | <i>Lactobacillales</i> | <i>Lactobacillaceae</i>  | <i>Lactobacillus johnsonii</i> NCC 533                                     |

|                   |                |                        |                         |                                                                        |
|-------------------|----------------|------------------------|-------------------------|------------------------------------------------------------------------|
| <i>Firmicutes</i> | <i>Bacilli</i> | <i>Lactobacillales</i> | <i>Lactobacillaceae</i> | <i>Lactobacillus plantarum</i> WCFS1                                   |
| <i>Firmicutes</i> | <i>Bacilli</i> | <i>Lactobacillales</i> | <i>Lactobacillaceae</i> | <i>Lactobacillus reuteri</i> F275                                      |
| <i>Firmicutes</i> | <i>Bacilli</i> | <i>Lactobacillales</i> | <i>Lactobacillaceae</i> | <i>Lactobacillus sakei</i> subsp. <i>sakei</i> 23K                     |
| <i>Firmicutes</i> | <i>Bacilli</i> | <i>Lactobacillales</i> | <i>Lactobacillaceae</i> | <i>Lactobacillus salivarius</i> UCC118                                 |
| <i>Firmicutes</i> | <i>Bacilli</i> | <i>Lactobacillales</i> | <i>Lactobacillaceae</i> | <i>Pediococcus pentosaceus</i> ATCC 25745                              |
| <i>Firmicutes</i> | <i>Bacilli</i> | <i>Lactobacillales</i> | <i>Leuconostocaceae</i> | <i>Leuconostoc mesenteroides</i> subsp. <i>mesenteroides</i> ATCC 8293 |
| <i>Firmicutes</i> | <i>Bacilli</i> | <i>Lactobacillales</i> | <i>Leuconostocaceae</i> | <i>Oenococcus oeni</i> PSU-1                                           |
| <i>Firmicutes</i> | <i>Bacilli</i> | <i>Lactobacillales</i> | <i>Streptococcaceae</i> | <i>Lactococcus lactis</i> subsp. <i>cremoris</i> MG1363                |
| <i>Firmicutes</i> | <i>Bacilli</i> | <i>Lactobacillales</i> | <i>Streptococcaceae</i> | <i>Lactococcus lactis</i> subsp. <i>cremoris</i> SK11                  |
| <i>Firmicutes</i> | <i>Bacilli</i> | <i>Lactobacillales</i> | <i>Streptococcaceae</i> | <i>Lactococcus lactis</i> subsp. <i>lactis</i> Il1403                  |
| <i>Firmicutes</i> | <i>Bacilli</i> | <i>Lactobacillales</i> | <i>Streptococcaceae</i> | <i>Streptococcus agalactiae</i> 2603V/R                                |
| <i>Firmicutes</i> | <i>Bacilli</i> | <i>Lactobacillales</i> | <i>Streptococcaceae</i> | <i>Streptococcus agalactiae</i> A909                                   |
| <i>Firmicutes</i> | <i>Bacilli</i> | <i>Lactobacillales</i> | <i>Streptococcaceae</i> | <i>Streptococcus agalactiae</i> NEM316                                 |
| <i>Firmicutes</i> | <i>Bacilli</i> | <i>Lactobacillales</i> | <i>Streptococcaceae</i> | <i>Streptococcus gordonii</i> str. <i>Challis</i> substr. <i>CH1</i>   |
| <i>Firmicutes</i> | <i>Bacilli</i> | <i>Lactobacillales</i> | <i>Streptococcaceae</i> | <i>Streptococcus mutans</i> UA159                                      |
| <i>Firmicutes</i> | <i>Bacilli</i> | <i>Lactobacillales</i> | <i>Streptococcaceae</i> | <i>Streptococcus pneumoniae</i> D39                                    |
| <i>Firmicutes</i> | <i>Bacilli</i> | <i>Lactobacillales</i> | <i>Streptococcaceae</i> | <i>Streptococcus pneumoniae</i> R6                                     |
| <i>Firmicutes</i> | <i>Bacilli</i> | <i>Lactobacillales</i> | <i>Streptococcaceae</i> | <i>Streptococcus pneumoniae</i> TIGR4                                  |
| <i>Firmicutes</i> | <i>Bacilli</i> | <i>Lactobacillales</i> | <i>Streptococcaceae</i> | <i>Streptococcus pyogenes</i> M1 GAS                                   |
| <i>Firmicutes</i> | <i>Bacilli</i> | <i>Lactobacillales</i> | <i>Streptococcaceae</i> | <i>Streptococcus pyogenes</i> MGAS10270                                |
| <i>Firmicutes</i> | <i>Bacilli</i> | <i>Lactobacillales</i> | <i>Streptococcaceae</i> | <i>Streptococcus pyogenes</i> MGAS10394                                |
| <i>Firmicutes</i> | <i>Bacilli</i> | <i>Lactobacillales</i> | <i>Streptococcaceae</i> | <i>Streptococcus pyogenes</i> MGAS10750                                |
| <i>Firmicutes</i> | <i>Bacilli</i> | <i>Lactobacillales</i> | <i>Streptococcaceae</i> | <i>Streptococcus pyogenes</i> MGAS2096                                 |
| <i>Firmicutes</i> | <i>Bacilli</i> | <i>Lactobacillales</i> | <i>Streptococcaceae</i> | <i>Streptococcus pyogenes</i> MGAS315                                  |
| <i>Firmicutes</i> | <i>Bacilli</i> | <i>Lactobacillales</i> | <i>Streptococcaceae</i> | <i>Streptococcus pyogenes</i> MGAS5005                                 |
| <i>Firmicutes</i> | <i>Bacilli</i> | <i>Lactobacillales</i> | <i>Streptococcaceae</i> | <i>Streptococcus pyogenes</i> MGAS6180                                 |
| <i>Firmicutes</i> | <i>Bacilli</i> | <i>Lactobacillales</i> | <i>Streptococcaceae</i> | <i>Streptococcus pyogenes</i> MGAS8232                                 |
| <i>Firmicutes</i> | <i>Bacilli</i> | <i>Lactobacillales</i> | <i>Streptococcaceae</i> | <i>Streptococcus pyogenes</i> MGAS9429                                 |
| <i>Firmicutes</i> | <i>Bacilli</i> | <i>Lactobacillales</i> | <i>Streptococcaceae</i> | <i>Streptococcus pyogenes</i> SSI-1                                    |
| <i>Firmicutes</i> | <i>Bacilli</i> | <i>Lactobacillales</i> | <i>Streptococcaceae</i> | <i>Streptococcus pyogenes</i> str. <i>Manfredo</i>                     |
| <i>Firmicutes</i> | <i>Bacilli</i> | <i>Lactobacillales</i> | <i>Streptococcaceae</i> | <i>Streptococcus sanguinis</i> SK36                                    |
| <i>Firmicutes</i> | <i>Bacilli</i> | <i>Lactobacillales</i> | <i>Streptococcaceae</i> | <i>Streptococcus suis</i> 05ZYH33                                      |

|                       |                            |                               |                                                                    |                                                                   |
|-----------------------|----------------------------|-------------------------------|--------------------------------------------------------------------|-------------------------------------------------------------------|
| <i>Firmicutes</i>     | <i>Bacilli</i>             | <i>Lactobacillales</i>        | <i>Streptococcaceae</i>                                            | <i>Streptococcus suis</i> 98HAH33                                 |
| <i>Firmicutes</i>     | <i>Bacilli</i>             | <i>Lactobacillales</i>        | <i>Streptococcaceae</i>                                            | <i>Streptococcus thermophilus</i> CNRZ1066                        |
| <i>Firmicutes</i>     | <i>Bacilli</i>             | <i>Lactobacillales</i>        | <i>Streptococcaceae</i>                                            | <i>Streptococcus thermophilus</i> LMD-9                           |
| <i>Firmicutes</i>     | <i>Bacilli</i>             | <i>Lactobacillales</i>        | <i>Streptococcaceae</i>                                            | <i>Streptococcus thermophilus</i> LMG 18311                       |
| <i>Firmicutes</i>     | <i>Clostridia</i>          | <i>Clostridiales</i>          | <i>Clostridiaceae</i>                                              | <i>Alkaliphilus metalliredigens</i> QYMF                          |
| <i>Firmicutes</i>     | <i>Clostridia</i>          | <i>Clostridiales</i>          | <i>Clostridiaceae</i>                                              | <i>Alkaliphilus oremlandii</i> OhILAs                             |
| <i>Firmicutes</i>     | <i>Clostridia</i>          | <i>Clostridiales</i>          | <i>Clostridiaceae</i>                                              | <i>Clostridium acetobutylicum</i> ATCC 824                        |
| <i>Firmicutes</i>     | <i>Clostridia</i>          | <i>Clostridiales</i>          | <i>Clostridiaceae</i>                                              | <i>Clostridium beijerinckii</i> NCIMB 8052                        |
| <i>Firmicutes</i>     | <i>Clostridia</i>          | <i>Clostridiales</i>          | <i>Clostridiaceae</i>                                              | <i>Clostridium botulinum</i> A str. ATCC 19397                    |
| <i>Firmicutes</i>     | <i>Clostridia</i>          | <i>Clostridiales</i>          | <i>Clostridiaceae</i>                                              | <i>Clostridium botulinum</i> A str. ATCC 3502                     |
| <i>Firmicutes</i>     | <i>Clostridia</i>          | <i>Clostridiales</i>          | <i>Clostridiaceae</i>                                              | <i>Clostridium botulinum</i> A str. Hall                          |
| <i>Firmicutes</i>     | <i>Clostridia</i>          | <i>Clostridiales</i>          | <i>Clostridiaceae</i>                                              | <i>Clostridium botulinum</i> F str. Langeland                     |
| <i>Firmicutes</i>     | <i>Clostridia</i>          | <i>Clostridiales</i>          | <i>Clostridiaceae</i>                                              | <i>Clostridium difficile</i> 630                                  |
| <i>Firmicutes</i>     | <i>Clostridia</i>          | <i>Clostridiales</i>          | <i>Clostridiaceae</i>                                              | <i>Clostridium kluyveri</i> DSM 555                               |
| <i>Firmicutes</i>     | <i>Clostridia</i>          | <i>Clostridiales</i>          | <i>Clostridiaceae</i>                                              | <i>Clostridium novyi</i> NT                                       |
| <i>Firmicutes</i>     | <i>Clostridia</i>          | <i>Clostridiales</i>          | <i>Clostridiaceae</i>                                              | <i>Clostridium perfringens</i> ATCC 13124                         |
| <i>Firmicutes</i>     | <i>Clostridia</i>          | <i>Clostridiales</i>          | <i>Clostridiaceae</i>                                              | <i>Clostridium perfringens</i> SM101                              |
| <i>Firmicutes</i>     | <i>Clostridia</i>          | <i>Clostridiales</i>          | <i>Clostridiaceae</i>                                              | <i>Clostridium perfringens</i> str. 13*                           |
| <i>Firmicutes</i>     | <i>Clostridia</i>          | <i>Clostridiales</i>          | <i>Clostridiaceae</i>                                              | <i>Clostridium tetani</i> E88                                     |
| <i>Firmicutes</i>     | <i>Clostridia</i>          | <i>Clostridiales</i>          | <i>Clostridiaceae</i>                                              | <i>Clostridium thermocellum</i> ATCC 27405                        |
| <i>Firmicutes</i>     | <i>Clostridia</i>          | <i>Clostridiales</i>          | <i>Clostridiales</i> Family XVIII.<br><i>Incertae Sedis</i>        | <i>Symbiobacterium thermophilum</i> IAM 14863                     |
| <i>Firmicutes</i>     | <i>Clostridia</i>          | <i>Clostridiales</i>          | <i>Peptococcaceae</i>                                              | <i>Desulfotobacterium hafniense</i> Y51                           |
| <i>Firmicutes</i>     | <i>Clostridia</i>          | <i>Clostridiales</i>          | <i>Peptococcaceae</i>                                              | <i>Desulfotomaculum reducens</i> MI-1                             |
| <i>Firmicutes</i>     | <i>Clostridia</i>          | <i>Clostridiales</i>          | <i>Peptococcaceae</i>                                              | <i>Pelotomaculum thermopropionicum</i> SI                         |
| <i>Firmicutes</i>     | <i>Clostridia</i>          | <i>Clostridiales</i>          | <i>Syntrophomonadaceae</i>                                         | <i>Syntrophomonas wolfei</i> subsp. <i>wolfei</i> str. Goettingen |
| <i>Firmicutes</i>     | <i>Clostridia</i>          | <i>Thermoanaerobacterales</i> | <i>Thermoanaerobacteraceae</i>                                     | <i>Carboxydotherrmus hydrogenoformans</i> Z-2901                  |
| <i>Firmicutes</i>     | <i>Clostridia</i>          | <i>Thermoanaerobacterales</i> | <i>Thermoanaerobacteraceae</i>                                     | <i>Moorella thermoacetica</i> ATCC 39073                          |
| <i>Firmicutes</i>     | <i>Clostridia</i>          | <i>Thermoanaerobacterales</i> | <i>Thermoanaerobacteraceae</i>                                     | <i>Thermoanaerobacter tengcongensis</i> MB4                       |
| <i>Firmicutes</i>     | <i>Clostridia</i>          | <i>Thermoanaerobacterales</i> | <i>Thermoanaerobacterales</i><br>Family III. <i>Incertae Sedis</i> | <i>Caldicellulosiruptor saccharolyticus</i> DSM 8903              |
| <i>Fusobacteria</i>   | <i>Fusobacteria</i>        | <i>Fusobacteriales</i>        | <i>Fusobacteriaceae</i>                                            | <i>Fusobacterium nucleatum</i> subsp. <i>nucleatum</i> ATCC 25586 |
| <i>Planctomycetes</i> | <i>Planctomycetacia</i>    | <i>Planctomycetales</i>       | <i>Planctomycetaceae</i>                                           | <i>Rhodopirellula baltica</i> SH 1                                |
| <i>Proteobacteria</i> | <i>Alphaproteobacteria</i> | <i>Caulobacterales</i>        | <i>Caulobacteraceae</i>                                            | <i>Caulobacter crescentus</i> CB15                                |



|                       |                            |                        |                           |                                                |
|-----------------------|----------------------------|------------------------|---------------------------|------------------------------------------------|
| <i>Proteobacteria</i> | <i>Alphaproteobacteria</i> | <i>Rhizobiales</i>     | <i>Bartonellaceae</i>     | <i>Bartonella bacilliformis</i> KC583          |
| <i>Proteobacteria</i> | <i>Alphaproteobacteria</i> | <i>Rhizobiales</i>     | <i>Bartonellaceae</i>     | <i>Bartonella henselae</i> str. Houston-1      |
| <i>Proteobacteria</i> | <i>Alphaproteobacteria</i> | <i>Rhizobiales</i>     | <i>Bartonellaceae</i>     | <i>Bartonella quintana</i> str. Toulouse       |
| <i>Proteobacteria</i> | <i>Alphaproteobacteria</i> | <i>Rhizobiales</i>     | <i>Bradyrhizobiaceae</i>  | <i>Bradyrhizobium japonicum</i> USDA 110       |
| <i>Proteobacteria</i> | <i>Alphaproteobacteria</i> | <i>Rhizobiales</i>     | <i>Bradyrhizobiaceae</i>  | <i>Bradyrhizobium</i> sp. BTAi1                |
| <i>Proteobacteria</i> | <i>Alphaproteobacteria</i> | <i>Rhizobiales</i>     | <i>Bradyrhizobiaceae</i>  | <i>Bradyrhizobium</i> sp. ORS278               |
| <i>Proteobacteria</i> | <i>Alphaproteobacteria</i> | <i>Rhizobiales</i>     | <i>Bradyrhizobiaceae</i>  | <i>Nitrobacter hamburgensis</i> X14            |
| <i>Proteobacteria</i> | <i>Alphaproteobacteria</i> | <i>Rhizobiales</i>     | <i>Bradyrhizobiaceae</i>  | <i>Nitrobacter winogradskyi</i> Nb-255         |
| <i>Proteobacteria</i> | <i>Alphaproteobacteria</i> | <i>Rhizobiales</i>     | <i>Bradyrhizobiaceae</i>  | <i>Rhodopseudomonas palustris</i> BisA53       |
| <i>Proteobacteria</i> | <i>Alphaproteobacteria</i> | <i>Rhizobiales</i>     | <i>Bradyrhizobiaceae</i>  | <i>Rhodopseudomonas palustris</i> BisB18       |
| <i>Proteobacteria</i> | <i>Alphaproteobacteria</i> | <i>Rhizobiales</i>     | <i>Bradyrhizobiaceae</i>  | <i>Rhodopseudomonas palustris</i> BisB5        |
| <i>Proteobacteria</i> | <i>Alphaproteobacteria</i> | <i>Rhizobiales</i>     | <i>Bradyrhizobiaceae</i>  | <i>Rhodopseudomonas palustris</i> CGA009       |
| <i>Proteobacteria</i> | <i>Alphaproteobacteria</i> | <i>Rhizobiales</i>     | <i>Bradyrhizobiaceae</i>  | <i>Rhodopseudomonas palustris</i> HaA2         |
| <i>Proteobacteria</i> | <i>Alphaproteobacteria</i> | <i>Rhizobiales</i>     | <i>Brucellaceae</i>       | <i>Brucella abortus</i> bv. 1 str. 9-941       |
| <i>Proteobacteria</i> | <i>Alphaproteobacteria</i> | <i>Rhizobiales</i>     | <i>Brucellaceae</i>       | <i>Brucella melitensis</i> 16M                 |
| <i>Proteobacteria</i> | <i>Alphaproteobacteria</i> | <i>Rhizobiales</i>     | <i>Brucellaceae</i>       | <i>Brucella melitensis</i> biovar Abortus 2308 |
| <i>Proteobacteria</i> | <i>Alphaproteobacteria</i> | <i>Rhizobiales</i>     | <i>Brucellaceae</i>       | <i>Brucella ovis</i> ATCC 25840                |
| <i>Proteobacteria</i> | <i>Alphaproteobacteria</i> | <i>Rhizobiales</i>     | <i>Brucellaceae</i>       | <i>Brucella suis</i> 1330                      |
| <i>Proteobacteria</i> | <i>Alphaproteobacteria</i> | <i>Rhizobiales</i>     | <i>Brucellaceae</i>       | <i>Ochrobactrum anthropi</i> ATCC 49188        |
| <i>Proteobacteria</i> | <i>Alphaproteobacteria</i> | <i>Rhizobiales</i>     | <i>Phyllobacteriaceae</i> | <i>Mesorhizobium loti</i> MAFF303099           |
| <i>Proteobacteria</i> | <i>Alphaproteobacteria</i> | <i>Rhizobiales</i>     | <i>Phyllobacteriaceae</i> | <i>Mesorhizobium</i> sp. BNC1                  |
| <i>Proteobacteria</i> | <i>Alphaproteobacteria</i> | <i>Rhizobiales</i>     | <i>Phyllobacteriaceae</i> | <i>Parvibaculum lavamentivorans</i> DS-1       |
| <i>Proteobacteria</i> | <i>Alphaproteobacteria</i> | <i>Rhizobiales</i>     | <i>Rhizobiaceae</i>       | <i>Agrobacterium tumefaciens</i> str. C58      |
| <i>Proteobacteria</i> | <i>Alphaproteobacteria</i> | <i>Rhizobiales</i>     | <i>Rhizobiaceae</i>       | <i>Rhizobium etli</i> CFN 42                   |
| <i>Proteobacteria</i> | <i>Alphaproteobacteria</i> | <i>Rhizobiales</i>     | <i>Rhizobiaceae</i>       | <i>Rhizobium leguminosarum</i> bv. viciae 3841 |
| <i>Proteobacteria</i> | <i>Alphaproteobacteria</i> | <i>Rhizobiales</i>     | <i>Rhizobiaceae</i>       | <i>Sinorhizobium medicae</i> WSM419            |
| <i>Proteobacteria</i> | <i>Alphaproteobacteria</i> | <i>Rhizobiales</i>     | <i>Rhizobiaceae</i>       | <i>Sinorhizobium meliloti</i> 1021             |
| <i>Proteobacteria</i> | <i>Alphaproteobacteria</i> | <i>Rhizobiales</i>     | <i>Xanthobacteraceae</i>  | <i>Azorhizobium caulinodans</i> ORS 571        |
| <i>Proteobacteria</i> | <i>Alphaproteobacteria</i> | <i>Rhizobiales</i>     | <i>Xanthobacteraceae</i>  | <i>Xanthobacter autotrophicus</i> Py2          |
| <i>Proteobacteria</i> | <i>Alphaproteobacteria</i> | <i>Rhodobacterales</i> | <i>Hyphomonadaceae</i>    | <i>Hyphomonas neptunium</i> ATCC 15444         |
| <i>Proteobacteria</i> | <i>Alphaproteobacteria</i> | <i>Rhodobacterales</i> | <i>Hyphomonadaceae</i>    | <i>Maricaulis maris</i> MCS10                  |
| <i>Proteobacteria</i> | <i>Alphaproteobacteria</i> | <i>Rhodobacterales</i> | <i>Rhodobacteraceae</i>   | <i>Jannaschia</i> sp. CCS1                     |



|                       |                            |                         |                          |                                                          |
|-----------------------|----------------------------|-------------------------|--------------------------|----------------------------------------------------------|
| <i>Proteobacteria</i> | <i>Alphaproteobacteria</i> | <i>Rhodobacterales</i>  | <i>Rhodobacteraceae</i>  | <i>Paracoccus denitrificans</i> PD1222                   |
| <i>Proteobacteria</i> | <i>Alphaproteobacteria</i> | <i>Rhodobacterales</i>  | <i>Rhodobacteraceae</i>  | <i>Rhodobacter sphaeroides</i> 2.4.1                     |
| <i>Proteobacteria</i> | <i>Alphaproteobacteria</i> | <i>Rhodobacterales</i>  | <i>Rhodobacteraceae</i>  | <i>Rhodobacter sphaeroides</i> ATCC 17025                |
| <i>Proteobacteria</i> | <i>Alphaproteobacteria</i> | <i>Rhodobacterales</i>  | <i>Rhodobacteraceae</i>  | <i>Rhodobacter sphaeroides</i> ATCC 17029                |
| <i>Proteobacteria</i> | <i>Alphaproteobacteria</i> | <i>Rhodobacterales</i>  | <i>Rhodobacteraceae</i>  | <i>Roseobacter denitrificans</i> OCh 114                 |
| <i>Proteobacteria</i> | <i>Alphaproteobacteria</i> | <i>Rhodobacterales</i>  | <i>Rhodobacteraceae</i>  | <i>Silicibacter pomeroyi</i> DSS-3                       |
| <i>Proteobacteria</i> | <i>Alphaproteobacteria</i> | <i>Rhodobacterales</i>  | <i>Rhodobacteraceae</i>  | <i>Silicibacter</i> sp. TM1040                           |
| <i>Proteobacteria</i> | <i>Alphaproteobacteria</i> | <i>Rhodospirillales</i> | <i>Acetobacteraceae</i>  | <i>Acidiphilium cryptum</i> JF-5                         |
| <i>Proteobacteria</i> | <i>Alphaproteobacteria</i> | <i>Rhodospirillales</i> | <i>Acetobacteraceae</i>  | <i>Gluconobacter oxydans</i> 621H                        |
| <i>Proteobacteria</i> | <i>Alphaproteobacteria</i> | <i>Rhodospirillales</i> | <i>Acetobacteraceae</i>  | <i>Granulibacter bethesdensis</i> CGDNIH1                |
| <i>Proteobacteria</i> | <i>Alphaproteobacteria</i> | <i>Rhodospirillales</i> | <i>Rhodospirillaceae</i> | <i>Magnetospirillum magneticum</i> AMB-1                 |
| <i>Proteobacteria</i> | <i>Alphaproteobacteria</i> | <i>Rhodospirillales</i> | <i>Rhodospirillaceae</i> | <i>Rhodospirillum rubrum</i> ATCC 11170                  |
| <i>Proteobacteria</i> | <i>Alphaproteobacteria</i> | <i>Rickettsiales</i>    | -                        | <i>Candidatus Pelagibacter ubique</i> HTCC1062           |
| <i>Proteobacteria</i> | <i>Alphaproteobacteria</i> | <i>Rickettsiales</i>    | <i>Anaplasmataceae</i>   | <i>Anaplasma marginale</i> str. St. Maries               |
| <i>Proteobacteria</i> | <i>Alphaproteobacteria</i> | <i>Rickettsiales</i>    | <i>Anaplasmataceae</i>   | <i>Anaplasma phagocytophilum</i> HZ                      |
| <i>Proteobacteria</i> | <i>Alphaproteobacteria</i> | <i>Rickettsiales</i>    | <i>Anaplasmataceae</i>   | <i>Ehrlichia canis</i> str. Jake                         |
| <i>Proteobacteria</i> | <i>Alphaproteobacteria</i> | <i>Rickettsiales</i>    | <i>Anaplasmataceae</i>   | <i>Ehrlichia chaffeensis</i> str. Arkansas               |
| <i>Proteobacteria</i> | <i>Alphaproteobacteria</i> | <i>Rickettsiales</i>    | <i>Anaplasmataceae</i>   | <i>Ehrlichia ruminantium</i> str. Gardel                 |
| <i>Proteobacteria</i> | <i>Alphaproteobacteria</i> | <i>Rickettsiales</i>    | <i>Anaplasmataceae</i>   | <i>Ehrlichia ruminantium</i> str. Welgevonden            |
| <i>Proteobacteria</i> | <i>Alphaproteobacteria</i> | <i>Rickettsiales</i>    | <i>Anaplasmataceae</i>   | <i>Neorickettsia sennetsu</i> str. Miyayama              |
| <i>Proteobacteria</i> | <i>Alphaproteobacteria</i> | <i>Rickettsiales</i>    | <i>Rickettsiaceae</i>    | <i>Orientia tsutsugamushi</i> str. Boryong               |
| <i>Proteobacteria</i> | <i>Alphaproteobacteria</i> | <i>Rickettsiales</i>    | <i>Rickettsiaceae</i>    | <i>Rickettsia akari</i> str. Hartford                    |
| <i>Proteobacteria</i> | <i>Alphaproteobacteria</i> | <i>Rickettsiales</i>    | <i>Rickettsiaceae</i>    | <i>Rickettsia bellii</i> OSU 85-389                      |
| <i>Proteobacteria</i> | <i>Alphaproteobacteria</i> | <i>Rickettsiales</i>    | <i>Rickettsiaceae</i>    | <i>Rickettsia bellii</i> RML369-C                        |
| <i>Proteobacteria</i> | <i>Alphaproteobacteria</i> | <i>Rickettsiales</i>    | <i>Rickettsiaceae</i>    | <i>Rickettsia canadensis</i> str. McKiel                 |
| <i>Proteobacteria</i> | <i>Alphaproteobacteria</i> | <i>Rickettsiales</i>    | <i>Rickettsiaceae</i>    | <i>Rickettsia conorii</i> str. Malish 7                  |
| <i>Proteobacteria</i> | <i>Alphaproteobacteria</i> | <i>Rickettsiales</i>    | <i>Rickettsiaceae</i>    | <i>Rickettsia felis</i> URRWXC2                          |
| <i>Proteobacteria</i> | <i>Alphaproteobacteria</i> | <i>Rickettsiales</i>    | <i>Rickettsiaceae</i>    | <i>Rickettsia massiliae</i> MTU5                         |
| <i>Proteobacteria</i> | <i>Alphaproteobacteria</i> | <i>Rickettsiales</i>    | <i>Rickettsiaceae</i>    | <i>Rickettsia prowazekii</i> str. Madrid E               |
| <i>Proteobacteria</i> | <i>Alphaproteobacteria</i> | <i>Rickettsiales</i>    | <i>Rickettsiaceae</i>    | <i>Rickettsia rickettsii</i> str. 'Sheila Smith'         |
| <i>Proteobacteria</i> | <i>Alphaproteobacteria</i> | <i>Rickettsiales</i>    | <i>Rickettsiaceae</i>    | <i>Rickettsia typhi</i> str. Wilmington                  |
| <i>Proteobacteria</i> | <i>Alphaproteobacteria</i> | <i>Rickettsiales</i>    | <i>Rickettsiaceae</i>    | <i>Wolbachia endosymbiont of Drosophila melanogaster</i> |

|                       |                            |                         |                           |                                                           |
|-----------------------|----------------------------|-------------------------|---------------------------|-----------------------------------------------------------|
| <i>Proteobacteria</i> | <i>Alphaproteobacteria</i> | <i>Rickettsiales</i>    | <i>Rickettsiaceae</i>     | <i>Wolbachia endosymbiont strain TRS of Brugia malayi</i> |
| <i>Proteobacteria</i> | <i>Alphaproteobacteria</i> | <i>Sphingomonadales</i> | <i>Erythrobacteraceae</i> | <i>Erythrobacter litoralis</i> HTCC2594                   |
| <i>Proteobacteria</i> | <i>Alphaproteobacteria</i> | <i>Sphingomonadales</i> | <i>Sphingomonadaceae</i>  | <i>Novosphingobium aromaticivorans</i> DSM 12444          |
| <i>Proteobacteria</i> | <i>Alphaproteobacteria</i> | <i>Sphingomonadales</i> | <i>Sphingomonadaceae</i>  | <i>Sphingomonas wittichii</i> RW1                         |
| <i>Proteobacteria</i> | <i>Alphaproteobacteria</i> | <i>Sphingomonadales</i> | <i>Sphingomonadaceae</i>  | <i>Sphingopyxis alaskensis</i> RB2256                     |
| <i>Proteobacteria</i> | <i>Alphaproteobacteria</i> | <i>Sphingomonadales</i> | <i>Sphingomonadaceae</i>  | <i>Zymomonas mobilis</i> subsp. <i>mobilis</i> ZM4        |
| <i>Proteobacteria</i> | <i>Betaproteobacteria</i>  | <i>Burkholderiales</i>  | <i>Alcaligenaceae</i>     | <i>Bordetella avium</i> 197N                              |
| <i>Proteobacteria</i> | <i>Betaproteobacteria</i>  | <i>Burkholderiales</i>  | <i>Alcaligenaceae</i>     | <i>Bordetella bronchiseptica</i> RB50                     |
| <i>Proteobacteria</i> | <i>Betaproteobacteria</i>  | <i>Burkholderiales</i>  | <i>Alcaligenaceae</i>     | <i>Bordetella parapertussis</i> 12822                     |
| <i>Proteobacteria</i> | <i>Betaproteobacteria</i>  | <i>Burkholderiales</i>  | <i>Alcaligenaceae</i>     | <i>Bordetella pertussis</i> Tohama I                      |
| <i>Proteobacteria</i> | <i>Betaproteobacteria</i>  | <i>Burkholderiales</i>  | <i>Burkholderiaceae</i>   | <i>Burkholderia ambifaria</i> AMMD                        |
| <i>Proteobacteria</i> | <i>Betaproteobacteria</i>  | <i>Burkholderiales</i>  | <i>Burkholderiaceae</i>   | <i>Burkholderia cenocepacia</i> AU 1054                   |
| <i>Proteobacteria</i> | <i>Betaproteobacteria</i>  | <i>Burkholderiales</i>  | <i>Burkholderiaceae</i>   | <i>Burkholderia cenocepacia</i> HI2424                    |
| <i>Proteobacteria</i> | <i>Betaproteobacteria</i>  | <i>Burkholderiales</i>  | <i>Burkholderiaceae</i>   | <i>Burkholderia mallei</i> ATCC 23344                     |
| <i>Proteobacteria</i> | <i>Betaproteobacteria</i>  | <i>Burkholderiales</i>  | <i>Burkholderiaceae</i>   | <i>Burkholderia mallei</i> NCTC 10229                     |
| <i>Proteobacteria</i> | <i>Betaproteobacteria</i>  | <i>Burkholderiales</i>  | <i>Burkholderiaceae</i>   | <i>Burkholderia mallei</i> NCTC 10247                     |
| <i>Proteobacteria</i> | <i>Betaproteobacteria</i>  | <i>Burkholderiales</i>  | <i>Burkholderiaceae</i>   | <i>Burkholderia mallei</i> SAVP1                          |
| <i>Proteobacteria</i> | <i>Betaproteobacteria</i>  | <i>Burkholderiales</i>  | <i>Burkholderiaceae</i>   | <i>Burkholderia pseudomallei</i> 1106a                    |
| <i>Proteobacteria</i> | <i>Betaproteobacteria</i>  | <i>Burkholderiales</i>  | <i>Burkholderiaceae</i>   | <i>Burkholderia pseudomallei</i> 1710b                    |
| <i>Proteobacteria</i> | <i>Betaproteobacteria</i>  | <i>Burkholderiales</i>  | <i>Burkholderiaceae</i>   | <i>Burkholderia pseudomallei</i> 668                      |
| <i>Proteobacteria</i> | <i>Betaproteobacteria</i>  | <i>Burkholderiales</i>  | <i>Burkholderiaceae</i>   | <i>Burkholderia pseudomallei</i> K96243                   |
| <i>Proteobacteria</i> | <i>Betaproteobacteria</i>  | <i>Burkholderiales</i>  | <i>Burkholderiaceae</i>   | <i>Burkholderia</i> sp. 383                               |
| <i>Proteobacteria</i> | <i>Betaproteobacteria</i>  | <i>Burkholderiales</i>  | <i>Burkholderiaceae</i>   | <i>Burkholderia thailandensis</i> E264                    |
| <i>Proteobacteria</i> | <i>Betaproteobacteria</i>  | <i>Burkholderiales</i>  | <i>Burkholderiaceae</i>   | <i>Burkholderia vietnamiensis</i> G4                      |
| <i>Proteobacteria</i> | <i>Betaproteobacteria</i>  | <i>Burkholderiales</i>  | <i>Burkholderiaceae</i>   | <i>Burkholderia xenovorans</i> LB400                      |
| <i>Proteobacteria</i> | <i>Betaproteobacteria</i>  | <i>Burkholderiales</i>  | <i>Burkholderiaceae</i>   | <i>Polynucleobacter</i> sp. Q <sub>1</sub> W-P1DMWA-1     |
| <i>Proteobacteria</i> | <i>Betaproteobacteria</i>  | <i>Burkholderiales</i>  | <i>Burkholderiaceae</i>   | <i>Ralstonia eutropha</i> H16                             |
| <i>Proteobacteria</i> | <i>Betaproteobacteria</i>  | <i>Burkholderiales</i>  | <i>Burkholderiaceae</i>   | <i>Ralstonia eutropha</i> JMP134                          |
| <i>Proteobacteria</i> | <i>Betaproteobacteria</i>  | <i>Burkholderiales</i>  | <i>Burkholderiaceae</i>   | <i>Ralstonia metallidurans</i> CH34                       |
| <i>Proteobacteria</i> | <i>Betaproteobacteria</i>  | <i>Burkholderiales</i>  | <i>Burkholderiaceae</i>   | <i>Ralstonia solanacearum</i> GMI1000                     |
| <i>Proteobacteria</i> | <i>Betaproteobacteria</i>  | <i>Burkholderiales</i>  | <i>Comamonadaceae</i>     | <i>Acidovorax avenae</i> subsp. <i>citrulli</i> AAC00-1   |
| <i>Proteobacteria</i> | <i>Betaproteobacteria</i>  | <i>Burkholderiales</i>  | <i>Comamonadaceae</i>     | <i>Acidovorax</i> sp. JS42                                |

|                       |                            |                           |                                        |                                                                         |
|-----------------------|----------------------------|---------------------------|----------------------------------------|-------------------------------------------------------------------------|
| <i>Proteobacteria</i> | <i>Betaproteobacteria</i>  | <i>Burkholderiales</i>    | <i>Comamonadaceae</i>                  | <i>Polaromonas naphthalenivorans</i> CJ2                                |
| <i>Proteobacteria</i> | <i>Betaproteobacteria</i>  | <i>Burkholderiales</i>    | <i>Comamonadaceae</i>                  | <i>Polaromonas</i> sp. JS666                                            |
| <i>Proteobacteria</i> | <i>Betaproteobacteria</i>  | <i>Burkholderiales</i>    | <i>Comamonadaceae</i>                  | <i>Rhodoferax ferrireducens</i> T118                                    |
| <i>Proteobacteria</i> | <i>Betaproteobacteria</i>  | <i>Burkholderiales</i>    | <i>Comamonadaceae</i>                  | <i>Verminephrobacter eiseniae</i> EF01-2                                |
| <i>Proteobacteria</i> | <i>Betaproteobacteria</i>  | <i>Burkholderiales</i>    | <i>Oxalobacteraceae</i>                | <i>Herminiimonas arsenicoxydans</i>                                     |
| <i>Proteobacteria</i> | <i>Betaproteobacteria</i>  | <i>Burkholderiales</i>    | <i>Oxalobacteraceae</i>                | <i>Janthinobacterium</i> sp. Marseille                                  |
| <i>Proteobacteria</i> | <i>Betaproteobacteria</i>  | <i>Burkholderiales</i>    | unclassified<br><i>Burkholderiales</i> | <i>Methylibium petroleiphilum</i> PM1                                   |
| <i>Proteobacteria</i> | <i>Betaproteobacteria</i>  | <i>Hydrogenophilales</i>  | <i>Hydrogenophilaceae</i>              | <i>Thiobacillus denitrificans</i> ATCC 25259                            |
| <i>Proteobacteria</i> | <i>Betaproteobacteria</i>  | <i>Methylophilales</i>    | <i>Methylophilaceae</i>                | <i>Methylobacillus flagellatus</i> KT                                   |
| <i>Proteobacteria</i> | <i>Betaproteobacteria</i>  | <i>Neisseriales</i>       | <i>Neisseriaceae</i>                   | <i>Chromobacterium violaceum</i> ATCC 12472                             |
| <i>Proteobacteria</i> | <i>Betaproteobacteria</i>  | <i>Neisseriales</i>       | <i>Neisseriaceae</i>                   | <i>Neisseria gonorrhoeae</i> FA 1090                                    |
| <i>Proteobacteria</i> | <i>Betaproteobacteria</i>  | <i>Neisseriales</i>       | <i>Neisseriaceae</i>                   | <i>Neisseria meningitidis</i> FAM18                                     |
| <i>Proteobacteria</i> | <i>Betaproteobacteria</i>  | <i>Neisseriales</i>       | <i>Neisseriaceae</i>                   | <i>Neisseria meningitidis</i> MC58                                      |
| <i>Proteobacteria</i> | <i>Betaproteobacteria</i>  | <i>Neisseriales</i>       | <i>Neisseriaceae</i>                   | <i>Neisseria meningitidis</i> Z2491                                     |
| <i>Proteobacteria</i> | <i>Betaproteobacteria</i>  | <i>Nitrosomonadales</i>   | <i>Nitrosomonadaceae</i>               | <i>Nitrosomonas europaea</i> ATCC 19718                                 |
| <i>Proteobacteria</i> | <i>Betaproteobacteria</i>  | <i>Nitrosomonadales</i>   | <i>Nitrosomonadaceae</i>               | <i>Nitrosomonas eutropha</i> C91                                        |
| <i>Proteobacteria</i> | <i>Betaproteobacteria</i>  | <i>Nitrosomonadales</i>   | <i>Nitrosomonadaceae</i>               | <i>Nitrospira multiformis</i> ATCC 25196                                |
| <i>Proteobacteria</i> | <i>Betaproteobacteria</i>  | <i>Rhodocyclales</i>      | <i>Rhodocyclaceae</i>                  | <i>Aromatoleum aromaticum</i> EbN1                                      |
| <i>Proteobacteria</i> | <i>Betaproteobacteria</i>  | <i>Rhodocyclales</i>      | <i>Rhodocyclaceae</i>                  | <i>Azoarcus</i> sp. BH72                                                |
| <i>Proteobacteria</i> | <i>Betaproteobacteria</i>  | <i>Rhodocyclales</i>      | <i>Rhodocyclaceae</i>                  | <i>Dechloromonas aromatica</i> RCB                                      |
| <i>Proteobacteria</i> | <i>Deltaproteobacteria</i> | <i>Bdellovibrionales</i>  | <i>Bdellovibrionaceae</i>              | <i>Bdellovibrio bacteriovorus</i> HD100                                 |
| <i>Proteobacteria</i> | <i>Deltaproteobacteria</i> | <i>Desulfobacterales</i>  | <i>Desulfobacteraceae</i>              | <i>Desulfococcus oleovorans</i> Hxd3                                    |
| <i>Proteobacteria</i> | <i>Deltaproteobacteria</i> | <i>Desulfobacterales</i>  | <i>Desulfobulbaceae</i>                | <i>Desulfotalea psychrophila</i> LSv54                                  |
| <i>Proteobacteria</i> | <i>Deltaproteobacteria</i> | <i>Desulfovibrionales</i> | <i>Desulfovibrionaceae</i>             | <i>Desulfovibrio desulfuricans</i> subsp. <i>desulfuricans</i> str. G20 |
| <i>Proteobacteria</i> | <i>Deltaproteobacteria</i> | <i>Desulfovibrionales</i> | <i>Desulfovibrionaceae</i>             | <i>Desulfovibrio vulgaris</i> subsp. <i>vulgaris</i> DP4                |
| <i>Proteobacteria</i> | <i>Deltaproteobacteria</i> | <i>Desulfovibrionales</i> | <i>Desulfovibrionaceae</i>             | <i>Desulfovibrio vulgaris</i> subsp. <i>vulgaris</i> str. Hildenborough |
| <i>Proteobacteria</i> | <i>Deltaproteobacteria</i> | <i>Desulfovibrionales</i> | <i>Desulfovibrionaceae</i>             | <i>Lawsonia intracellularis</i> PHE/MN1-00                              |
| <i>Proteobacteria</i> | <i>Deltaproteobacteria</i> | <i>Desulfuromonadales</i> | <i>Geobacteraceae</i>                  | <i>Geobacter metallireducens</i> GS-15                                  |
| <i>Proteobacteria</i> | <i>Deltaproteobacteria</i> | <i>Desulfuromonadales</i> | <i>Geobacteraceae</i>                  | <i>Geobacter sulfurreducens</i> PCA                                     |
| <i>Proteobacteria</i> | <i>Deltaproteobacteria</i> | <i>Desulfuromonadales</i> | <i>Geobacteraceae</i>                  | <i>Geobacter uraniireducens</i> Rf4                                     |
| <i>Proteobacteria</i> | <i>Deltaproteobacteria</i> | <i>Desulfuromonadales</i> | <i>Pelobacteraceae</i>                 | <i>Pelobacter carbinolicus</i> DSM 2380                                 |
| <i>Proteobacteria</i> | <i>Deltaproteobacteria</i> | <i>Desulfuromonadales</i> | <i>Pelobacteraceae</i>                 | <i>Pelobacter propionicus</i> DSM 2379                                  |

|                       |                              |                                              |                               |                                                                |
|-----------------------|------------------------------|----------------------------------------------|-------------------------------|----------------------------------------------------------------|
| <i>Proteobacteria</i> | <i>Deltaproteobacteria</i>   | <i>Myxococcales</i>                          | <i>Cystobacterineae</i>       | <i>Anaeromyxobacter dehalogenans</i> 2CP-C                     |
| <i>Proteobacteria</i> | <i>Deltaproteobacteria</i>   | <i>Myxococcales</i>                          | <i>Cystobacterineae</i>       | <i>Anaeromyxobacter</i> sp. Fw109-5                            |
| <i>Proteobacteria</i> | <i>Deltaproteobacteria</i>   | <i>Myxococcales</i>                          | <i>Cystobacterineae</i>       | <i>Myxococcus xanthus</i> DK 1622                              |
| <i>Proteobacteria</i> | <i>Deltaproteobacteria</i>   | <i>Syntrophobacterales</i>                   | <i>Syntrophaceae</i>          | <i>Syntrophus aciditrophicus</i> SB                            |
| <i>Proteobacteria</i> | <i>Deltaproteobacteria</i>   | <i>Syntrophobacterales</i>                   | <i>Syntrophobacteraceae</i>   | <i>Syntrophobacter fumaroxidans</i> MPOB                       |
| <i>Proteobacteria</i> | <i>Epsilonproteobacteria</i> | <i>Campylobacterales</i>                     | <i>Campylobacteraceae</i>     | <i>Arcobacter butzleri</i> RM4018                              |
| <i>Proteobacteria</i> | <i>Epsilonproteobacteria</i> | <i>Campylobacterales</i>                     | <i>Campylobacteraceae</i>     | <i>Campylobacter concisus</i> 13826                            |
| <i>Proteobacteria</i> | <i>Epsilonproteobacteria</i> | <i>Campylobacterales</i>                     | <i>Campylobacteraceae</i>     | <i>Campylobacter curvus</i> 525.92                             |
| <i>Proteobacteria</i> | <i>Epsilonproteobacteria</i> | <i>Campylobacterales</i>                     | <i>Campylobacteraceae</i>     | <i>Campylobacter fetus</i> subsp. <i>fetus</i> 82-40           |
| <i>Proteobacteria</i> | <i>Epsilonproteobacteria</i> | <i>Campylobacterales</i>                     | <i>Campylobacteraceae</i>     | <i>Campylobacter hominis</i> ATCC BAA-381                      |
| <i>Proteobacteria</i> | <i>Epsilonproteobacteria</i> | <i>Campylobacterales</i>                     | <i>Campylobacteraceae</i>     | <i>Campylobacter jejuni</i> RM1221                             |
| <i>Proteobacteria</i> | <i>Epsilonproteobacteria</i> | <i>Campylobacterales</i>                     | <i>Campylobacteraceae</i>     | <i>Campylobacter jejuni</i> subsp. <i>doylei</i> 269.97        |
| <i>Proteobacteria</i> | <i>Epsilonproteobacteria</i> | <i>Campylobacterales</i>                     | <i>Campylobacteraceae</i>     | <i>Campylobacter jejuni</i> subsp. <i>jejuni</i> 81116         |
| <i>Proteobacteria</i> | <i>Epsilonproteobacteria</i> | <i>Campylobacterales</i>                     | <i>Campylobacteraceae</i>     | <i>Campylobacter jejuni</i> subsp. <i>jejuni</i> 81-176        |
| <i>Proteobacteria</i> | <i>Epsilonproteobacteria</i> | <i>Campylobacterales</i>                     | <i>Campylobacteraceae</i>     | <i>Campylobacter jejuni</i> subsp. <i>jejuni</i> NCTC 11168    |
| <i>Proteobacteria</i> | <i>Epsilonproteobacteria</i> | <i>Campylobacterales</i>                     | <i>Helicobacteraceae</i>      | <i>Helicobacter acinonychis</i> str. <i>Sheeba</i>             |
| <i>Proteobacteria</i> | <i>Epsilonproteobacteria</i> | <i>Campylobacterales</i>                     | <i>Helicobacteraceae</i>      | <i>Helicobacter hepaticus</i> ATCC 51449                       |
| <i>Proteobacteria</i> | <i>Epsilonproteobacteria</i> | <i>Campylobacterales</i>                     | <i>Helicobacteraceae</i>      | <i>Helicobacter pylori</i> 26695                               |
| <i>Proteobacteria</i> | <i>Epsilonproteobacteria</i> | <i>Campylobacterales</i>                     | <i>Helicobacteraceae</i>      | <i>Helicobacter pylori</i> HPAG1                               |
| <i>Proteobacteria</i> | <i>Epsilonproteobacteria</i> | <i>Campylobacterales</i>                     | <i>Helicobacteraceae</i>      | <i>Helicobacter pylori</i> J99                                 |
| <i>Proteobacteria</i> | <i>Epsilonproteobacteria</i> | <i>Campylobacterales</i>                     | <i>Helicobacteraceae</i>      | <i>Sulfurimonas denitrificans</i> DSM 1251                     |
| <i>Proteobacteria</i> | <i>Epsilonproteobacteria</i> | <i>Campylobacterales</i>                     | <i>Helicobacteraceae</i>      | <i>Wolinella succinogenes</i> DSM 1740                         |
| <i>Proteobacteria</i> | <i>Epsilonproteobacteria</i> | unclassified<br><i>Epsilonproteobacteria</i> | -                             | <i>Nitratiruptor</i> sp. SB155-2                               |
| <i>Proteobacteria</i> | <i>Epsilonproteobacteria</i> | unclassified<br><i>Epsilonproteobacteria</i> | -                             | <i>Sulfurovum</i> sp. NBC37-1                                  |
| <i>Proteobacteria</i> | <i>Gammaproteobacteria</i>   | <i>Aeromonadales</i>                         | <i>Aeromonadaceae</i>         | <i>Aeromonas hydrophila</i> subsp. <i>hydrophila</i> ATCC 7966 |
| <i>Proteobacteria</i> | <i>Gammaproteobacteria</i>   | <i>Aeromonadales</i>                         | <i>Aeromonadaceae</i>         | <i>Aeromonas salmonicida</i> subsp. <i>salmonicida</i> A449    |
| <i>Proteobacteria</i> | <i>Gammaproteobacteria</i>   | <i>Alteromonadales</i>                       | <i>Alteromonadaceae</i>       | <i>Marinobacter aquaeolei</i> VT8                              |
| <i>Proteobacteria</i> | <i>Gammaproteobacteria</i>   | <i>Alteromonadales</i>                       | <i>Alteromonadaceae</i>       | <i>Saccharophagus degradans</i> 2-40                           |
| <i>Proteobacteria</i> | <i>Gammaproteobacteria</i>   | <i>Alteromonadales</i>                       | <i>Colwelliaceae</i>          | <i>Colwellia psychrerythraea</i> 34H                           |
| <i>Proteobacteria</i> | <i>Gammaproteobacteria</i>   | <i>Alteromonadales</i>                       | <i>Idiomarinaceae</i>         | <i>Idiomarina loihiensis</i> L2TR                              |
| <i>Proteobacteria</i> | <i>Gammaproteobacteria</i>   | <i>Alteromonadales</i>                       | <i>Pseudoalteromonadaceae</i> | <i>Pseudoalteromonas atlantica</i> T6c                         |
| <i>Proteobacteria</i> | <i>Gammaproteobacteria</i>   | <i>Alteromonadales</i>                       | <i>Pseudoalteromonadaceae</i> | <i>Pseudoalteromonas haloplanktis</i> TAC125                   |

|                       |                            |                          |                               |                                                                   |
|-----------------------|----------------------------|--------------------------|-------------------------------|-------------------------------------------------------------------|
| <i>Proteobacteria</i> | <i>Gammaproteobacteria</i> | <i>Alteromonadales</i>   | <i>Psychromonadaceae</i>      | <i>Psychromonas ingrahamii</i> 37                                 |
| <i>Proteobacteria</i> | <i>Gammaproteobacteria</i> | <i>Alteromonadales</i>   | <i>Shewanellaceae</i>         | <i>Shewanella amazonensis</i> SB2B                                |
| <i>Proteobacteria</i> | <i>Gammaproteobacteria</i> | <i>Alteromonadales</i>   | <i>Shewanellaceae</i>         | <i>Shewanella baltica</i> OS155                                   |
| <i>Proteobacteria</i> | <i>Gammaproteobacteria</i> | <i>Alteromonadales</i>   | <i>Shewanellaceae</i>         | <i>Shewanella baltica</i> OS185                                   |
| <i>Proteobacteria</i> | <i>Gammaproteobacteria</i> | <i>Alteromonadales</i>   | <i>Shewanellaceae</i>         | <i>Shewanella denitrificans</i> OS217                             |
| <i>Proteobacteria</i> | <i>Gammaproteobacteria</i> | <i>Alteromonadales</i>   | <i>Shewanellaceae</i>         | <i>Shewanella frigidimarina</i> NCIMB 400                         |
| <i>Proteobacteria</i> | <i>Gammaproteobacteria</i> | <i>Alteromonadales</i>   | <i>Shewanellaceae</i>         | <i>Shewanella loihica</i> PV-4                                    |
| <i>Proteobacteria</i> | <i>Gammaproteobacteria</i> | <i>Alteromonadales</i>   | <i>Shewanellaceae</i>         | <i>Shewanella oneidensis</i> MR-1                                 |
| <i>Proteobacteria</i> | <i>Gammaproteobacteria</i> | <i>Alteromonadales</i>   | <i>Shewanellaceae</i>         | <i>Shewanella pealeana</i> ATCC 700345                            |
| <i>Proteobacteria</i> | <i>Gammaproteobacteria</i> | <i>Alteromonadales</i>   | <i>Shewanellaceae</i>         | <i>Shewanella putrefaciens</i> CN-32                              |
| <i>Proteobacteria</i> | <i>Gammaproteobacteria</i> | <i>Alteromonadales</i>   | <i>Shewanellaceae</i>         | <i>Shewanella sediminis</i> HAW-EB3                               |
| <i>Proteobacteria</i> | <i>Gammaproteobacteria</i> | <i>Alteromonadales</i>   | <i>Shewanellaceae</i>         | <i>Shewanella</i> sp. ANA-3                                       |
| <i>Proteobacteria</i> | <i>Gammaproteobacteria</i> | <i>Alteromonadales</i>   | <i>Shewanellaceae</i>         | <i>Shewanella</i> sp. MR-4                                        |
| <i>Proteobacteria</i> | <i>Gammaproteobacteria</i> | <i>Alteromonadales</i>   | <i>Shewanellaceae</i>         | <i>Shewanella</i> sp. MR-7                                        |
| <i>Proteobacteria</i> | <i>Gammaproteobacteria</i> | <i>Alteromonadales</i>   | <i>Shewanellaceae</i>         | <i>Shewanella</i> sp. W3-18-1                                     |
| <i>Proteobacteria</i> | <i>Gammaproteobacteria</i> | <i>Cardiobacteriales</i> | <i>Cardiobacteriaceae</i>     | <i>Dichelobacter nodosus</i> VCS1703A                             |
| <i>Proteobacteria</i> | <i>Gammaproteobacteria</i> | <i>Chromatiales</i>      | <i>Chromatiaceae</i>          | <i>Nitrosococcus oceani</i> ATCC 19707                            |
| <i>Proteobacteria</i> | <i>Gammaproteobacteria</i> | <i>Chromatiales</i>      | <i>Ectothiorhodospiraceae</i> | <i>Alkalilimnicola ehrlichei</i> MLHE-1                           |
| <i>Proteobacteria</i> | <i>Gammaproteobacteria</i> | <i>Chromatiales</i>      | <i>Ectothiorhodospiraceae</i> | <i>Halorhodospira halophila</i> SL1                               |
| <i>Proteobacteria</i> | <i>Gammaproteobacteria</i> | <i>Enterobacteriales</i> | <i>Enterobacteriaceae</i>     | <i>Buchnera aphidicola</i> str. APS ( <i>Acyrtosiphon pisum</i> ) |
| <i>Proteobacteria</i> | <i>Gammaproteobacteria</i> | <i>Enterobacteriales</i> | <i>Enterobacteriaceae</i>     | <i>Buchnera aphidicola</i> str. Bp ( <i>Baizongia pistaciae</i> ) |
| <i>Proteobacteria</i> | <i>Gammaproteobacteria</i> | <i>Enterobacteriales</i> | <i>Enterobacteriaceae</i>     | <i>Buchnera aphidicola</i> str. Cc ( <i>Cinara cedri</i> )        |
| <i>Proteobacteria</i> | <i>Gammaproteobacteria</i> | <i>Enterobacteriales</i> | <i>Enterobacteriaceae</i>     | <i>Buchnera aphidicola</i> str. Sg ( <i>Schizaphis graminum</i> ) |
| <i>Proteobacteria</i> | <i>Gammaproteobacteria</i> | <i>Enterobacteriales</i> | <i>Enterobacteriaceae</i>     | <i>Candidatus Blochmannia floridanus</i>                          |
| <i>Proteobacteria</i> | <i>Gammaproteobacteria</i> | <i>Enterobacteriales</i> | <i>Enterobacteriaceae</i>     | <i>Candidatus Blochmannia pennsylvanicus</i> str. BPEN            |
| <i>Proteobacteria</i> | <i>Gammaproteobacteria</i> | <i>Enterobacteriales</i> | <i>Enterobacteriaceae</i>     | <i>Citrobacter koseri</i> ATCC BAA-895                            |
| <i>Proteobacteria</i> | <i>Gammaproteobacteria</i> | <i>Enterobacteriales</i> | <i>Enterobacteriaceae</i>     | <i>Enterobacter sakazakii</i> ATCC BAA-894                        |
| <i>Proteobacteria</i> | <i>Gammaproteobacteria</i> | <i>Enterobacteriales</i> | <i>Enterobacteriaceae</i>     | <i>Enterobacter</i> sp. 638                                       |
| <i>Proteobacteria</i> | <i>Gammaproteobacteria</i> | <i>Enterobacteriales</i> | <i>Enterobacteriaceae</i>     | <i>Escherichia coli</i> 536                                       |
| <i>Proteobacteria</i> | <i>Gammaproteobacteria</i> | <i>Enterobacteriales</i> | <i>Enterobacteriaceae</i>     | <i>Escherichia coli</i> APEC O1                                   |
| <i>Proteobacteria</i> | <i>Gammaproteobacteria</i> | <i>Enterobacteriales</i> | <i>Enterobacteriaceae</i>     | <i>Escherichia coli</i> CFT073                                    |
| <i>Proteobacteria</i> | <i>Gammaproteobacteria</i> | <i>Enterobacteriales</i> | <i>Enterobacteriaceae</i>     | <i>Escherichia coli</i> E24377A                                   |

|                       |                            |                          |                           |                                                                               |
|-----------------------|----------------------------|--------------------------|---------------------------|-------------------------------------------------------------------------------|
| <i>Proteobacteria</i> | <i>Gammaproteobacteria</i> | <i>Enterobacteriales</i> | <i>Enterobacteriaceae</i> | <i>Escherichia coli HS</i>                                                    |
| <i>Proteobacteria</i> | <i>Gammaproteobacteria</i> | <i>Enterobacteriales</i> | <i>Enterobacteriaceae</i> | <i>Escherichia coli O157:H7 EDL933</i>                                        |
| <i>Proteobacteria</i> | <i>Gammaproteobacteria</i> | <i>Enterobacteriales</i> | <i>Enterobacteriaceae</i> | <i>Escherichia coli O157:H7 str. Sakai</i>                                    |
| <i>Proteobacteria</i> | <i>Gammaproteobacteria</i> | <i>Enterobacteriales</i> | <i>Enterobacteriaceae</i> | <i>Escherichia coli str. K12 substr. MG1655</i>                               |
| <i>Proteobacteria</i> | <i>Gammaproteobacteria</i> | <i>Enterobacteriales</i> | <i>Enterobacteriaceae</i> | <i>Escherichia coli str. K12 substr. W3110</i>                                |
| <i>Proteobacteria</i> | <i>Gammaproteobacteria</i> | <i>Enterobacteriales</i> | <i>Enterobacteriaceae</i> | <i>Escherichia coli UTI89</i>                                                 |
| <i>Proteobacteria</i> | <i>Gammaproteobacteria</i> | <i>Enterobacteriales</i> | <i>Enterobacteriaceae</i> | <i>Klebsiella pneumoniae subsp. pneumoniae MGH 78578</i>                      |
| <i>Proteobacteria</i> | <i>Gammaproteobacteria</i> | <i>Enterobacteriales</i> | <i>Enterobacteriaceae</i> | <i>Pectobacterium atrosepticum SCRI1043</i>                                   |
| <i>Proteobacteria</i> | <i>Gammaproteobacteria</i> | <i>Enterobacteriales</i> | <i>Enterobacteriaceae</i> | <i>Photorhabdus luminescens subsp. laumondii TTO1</i>                         |
| <i>Proteobacteria</i> | <i>Gammaproteobacteria</i> | <i>Enterobacteriales</i> | <i>Enterobacteriaceae</i> | <i>Salmonella enterica subsp. enterica serovar Choleraesuis str. SC-B67</i>   |
| <i>Proteobacteria</i> | <i>Gammaproteobacteria</i> | <i>Enterobacteriales</i> | <i>Enterobacteriaceae</i> | <i>Salmonella enterica subsp. enterica serovar Paratyphi A str. ATCC 9150</i> |
| <i>Proteobacteria</i> | <i>Gammaproteobacteria</i> | <i>Enterobacteriales</i> | <i>Enterobacteriaceae</i> | <i>Salmonella enterica subsp. enterica serovar Typhi str. CT18</i>            |
| <i>Proteobacteria</i> | <i>Gammaproteobacteria</i> | <i>Enterobacteriales</i> | <i>Enterobacteriaceae</i> | <i>Salmonella enterica subsp. enterica serovar Typhi str. Ty2</i>             |
| <i>Proteobacteria</i> | <i>Gammaproteobacteria</i> | <i>Enterobacteriales</i> | <i>Enterobacteriaceae</i> | <i>Salmonella typhimurium LT2</i>                                             |
| <i>Proteobacteria</i> | <i>Gammaproteobacteria</i> | <i>Enterobacteriales</i> | <i>Enterobacteriaceae</i> | <i>Serratia proteamaculans 568</i>                                            |
| <i>Proteobacteria</i> | <i>Gammaproteobacteria</i> | <i>Enterobacteriales</i> | <i>Enterobacteriaceae</i> | <i>Shigella boydii Sb227</i>                                                  |
| <i>Proteobacteria</i> | <i>Gammaproteobacteria</i> | <i>Enterobacteriales</i> | <i>Enterobacteriaceae</i> | <i>Shigella dysenteriae Sd197</i>                                             |
| <i>Proteobacteria</i> | <i>Gammaproteobacteria</i> | <i>Enterobacteriales</i> | <i>Enterobacteriaceae</i> | <i>Shigella flexneri 2a str. 2457T</i>                                        |
| <i>Proteobacteria</i> | <i>Gammaproteobacteria</i> | <i>Enterobacteriales</i> | <i>Enterobacteriaceae</i> | <i>Shigella flexneri 2a str. 301</i>                                          |
| <i>Proteobacteria</i> | <i>Gammaproteobacteria</i> | <i>Enterobacteriales</i> | <i>Enterobacteriaceae</i> | <i>Shigella flexneri 5 str. 8401</i>                                          |
| <i>Proteobacteria</i> | <i>Gammaproteobacteria</i> | <i>Enterobacteriales</i> | <i>Enterobacteriaceae</i> | <i>Shigella sonnei Ss046</i>                                                  |
| <i>Proteobacteria</i> | <i>Gammaproteobacteria</i> | <i>Enterobacteriales</i> | <i>Enterobacteriaceae</i> | <i>Sodalis glossinidius str. 'morsitans'</i>                                  |
| <i>Proteobacteria</i> | <i>Gammaproteobacteria</i> | <i>Enterobacteriales</i> | <i>Enterobacteriaceae</i> | <i>Wigglesworthia glossinidia endosymbiont of Glossina brevipalpis</i>        |
| <i>Proteobacteria</i> | <i>Gammaproteobacteria</i> | <i>Enterobacteriales</i> | <i>Enterobacteriaceae</i> | <i>Yersinia enterocolitica subsp. enterocolitica 8081</i>                     |
| <i>Proteobacteria</i> | <i>Gammaproteobacteria</i> | <i>Enterobacteriales</i> | <i>Enterobacteriaceae</i> | <i>Yersinia pestis Antiqua</i>                                                |
| <i>Proteobacteria</i> | <i>Gammaproteobacteria</i> | <i>Enterobacteriales</i> | <i>Enterobacteriaceae</i> | <i>Yersinia pestis biovar Microtus str. 91001</i>                             |
| <i>Proteobacteria</i> | <i>Gammaproteobacteria</i> | <i>Enterobacteriales</i> | <i>Enterobacteriaceae</i> | <i>Yersinia pestis CO92</i>                                                   |
| <i>Proteobacteria</i> | <i>Gammaproteobacteria</i> | <i>Enterobacteriales</i> | <i>Enterobacteriaceae</i> | <i>Yersinia pestis KIM</i>                                                    |
| <i>Proteobacteria</i> | <i>Gammaproteobacteria</i> | <i>Enterobacteriales</i> | <i>Enterobacteriaceae</i> | <i>Yersinia pestis Nepal516</i>                                               |
| <i>Proteobacteria</i> | <i>Gammaproteobacteria</i> | <i>Enterobacteriales</i> | <i>Enterobacteriaceae</i> | <i>Yersinia pestis Pestoides F</i>                                            |
| <i>Proteobacteria</i> | <i>Gammaproteobacteria</i> | <i>Enterobacteriales</i> | <i>Enterobacteriaceae</i> | <i>Yersinia pseudotuberculosis IP 31758</i>                                   |

|                       |                            |                          |                           |                                                                             |
|-----------------------|----------------------------|--------------------------|---------------------------|-----------------------------------------------------------------------------|
| <i>Proteobacteria</i> | <i>Gammaproteobacteria</i> | <i>Enterobacteriales</i> | <i>Enterobacteriaceae</i> | <i>Yersinia pseudotuberculosis</i> IP 32953                                 |
| <i>Proteobacteria</i> | <i>Gammaproteobacteria</i> | <i>Legionellales</i>     | <i>Coxiellaceae</i>       | <i>Coxiella burnetii</i> Dugway 5J108-111                                   |
| <i>Proteobacteria</i> | <i>Gammaproteobacteria</i> | <i>Legionellales</i>     | <i>Coxiellaceae</i>       | <i>Coxiella burnetii</i> RSA 493                                            |
| <i>Proteobacteria</i> | <i>Gammaproteobacteria</i> | <i>Legionellales</i>     | <i>Legionellaceae</i>     | <i>Legionella pneumophila</i> str. Corby                                    |
| <i>Proteobacteria</i> | <i>Gammaproteobacteria</i> | <i>Legionellales</i>     | <i>Legionellaceae</i>     | <i>Legionella pneumophila</i> str. Lens                                     |
| <i>Proteobacteria</i> | <i>Gammaproteobacteria</i> | <i>Legionellales</i>     | <i>Legionellaceae</i>     | <i>Legionella pneumophila</i> str. Paris                                    |
| <i>Proteobacteria</i> | <i>Gammaproteobacteria</i> | <i>Legionellales</i>     | <i>Legionellaceae</i>     | <i>Legionella pneumophila</i> subsp. <i>pneumophila</i> str. Philadelphia 1 |
| <i>Proteobacteria</i> | <i>Gammaproteobacteria</i> | <i>Methylococcales</i>   | <i>Methylococcaceae</i>   | <i>Methylococcus capsulatus</i> str. Bath                                   |
| <i>Proteobacteria</i> | <i>Gammaproteobacteria</i> | <i>Oceanospirillales</i> | <i>Alcanivoracaceae</i>   | <i>Alcanivorax borkumensis</i> SK2                                          |
| <i>Proteobacteria</i> | <i>Gammaproteobacteria</i> | <i>Oceanospirillales</i> | <i>Hahellaceae</i>        | <i>Hahella chejuensis</i> KCTC 2396                                         |
| <i>Proteobacteria</i> | <i>Gammaproteobacteria</i> | <i>Oceanospirillales</i> | <i>Halomonadaceae</i>     | <i>Chromohalobacter salexigens</i> DSM 3043                                 |
| <i>Proteobacteria</i> | <i>Gammaproteobacteria</i> | <i>Oceanospirillales</i> | <i>Oceanospirillaceae</i> | <i>Marinomonas</i> sp. MWYL1                                                |
| <i>Proteobacteria</i> | <i>Gammaproteobacteria</i> | <i>Pasteurellales</i>    | <i>Pasteurellaceae</i>    | <i>Actinobacillus pleuropneumoniae</i> L20                                  |
| <i>Proteobacteria</i> | <i>Gammaproteobacteria</i> | <i>Pasteurellales</i>    | <i>Pasteurellaceae</i>    | <i>Actinobacillus succinogenes</i> 130Z                                     |
| <i>Proteobacteria</i> | <i>Gammaproteobacteria</i> | <i>Pasteurellales</i>    | <i>Pasteurellaceae</i>    | <i>Haemophilus ducreyi</i> 35000HP                                          |
| <i>Proteobacteria</i> | <i>Gammaproteobacteria</i> | <i>Pasteurellales</i>    | <i>Pasteurellaceae</i>    | <i>Haemophilus influenzae</i> 86-028NP                                      |
| <i>Proteobacteria</i> | <i>Gammaproteobacteria</i> | <i>Pasteurellales</i>    | <i>Pasteurellaceae</i>    | <i>Haemophilus influenzae</i> PittEE                                        |
| <i>Proteobacteria</i> | <i>Gammaproteobacteria</i> | <i>Pasteurellales</i>    | <i>Pasteurellaceae</i>    | <i>Haemophilus influenzae</i> PittGG                                        |
| <i>Proteobacteria</i> | <i>Gammaproteobacteria</i> | <i>Pasteurellales</i>    | <i>Pasteurellaceae</i>    | <i>Haemophilus influenzae</i> Rd KW20                                       |
| <i>Proteobacteria</i> | <i>Gammaproteobacteria</i> | <i>Pasteurellales</i>    | <i>Pasteurellaceae</i>    | <i>Haemophilus somnus</i> 129PT                                             |
| <i>Proteobacteria</i> | <i>Gammaproteobacteria</i> | <i>Pasteurellales</i>    | <i>Pasteurellaceae</i>    | <i>Mannheimia succiniciproducens</i> MBEL55E                                |
| <i>Proteobacteria</i> | <i>Gammaproteobacteria</i> | <i>Pasteurellales</i>    | <i>Pasteurellaceae</i>    | <i>Pasteurella multocida</i> subsp. <i>multocida</i> str. Pm70              |
| <i>Proteobacteria</i> | <i>Gammaproteobacteria</i> | <i>Pseudomonadales</i>   | <i>Moraxellaceae</i>      | <i>Acinetobacter baumannii</i> ATCC 17978                                   |
| <i>Proteobacteria</i> | <i>Gammaproteobacteria</i> | <i>Pseudomonadales</i>   | <i>Moraxellaceae</i>      | <i>Acinetobacter</i> sp. ADP1                                               |
| <i>Proteobacteria</i> | <i>Gammaproteobacteria</i> | <i>Pseudomonadales</i>   | <i>Moraxellaceae</i>      | <i>Psychrobacter arcticus</i> 273-4                                         |
| <i>Proteobacteria</i> | <i>Gammaproteobacteria</i> | <i>Pseudomonadales</i>   | <i>Moraxellaceae</i>      | <i>Psychrobacter cryohalolentis</i> K5                                      |
| <i>Proteobacteria</i> | <i>Gammaproteobacteria</i> | <i>Pseudomonadales</i>   | <i>Moraxellaceae</i>      | <i>Psychrobacter</i> sp. PRwf-1                                             |
| <i>Proteobacteria</i> | <i>Gammaproteobacteria</i> | <i>Pseudomonadales</i>   | <i>Pseudomonadaceae</i>   | <i>Pseudomonas aeruginosa</i> PA7                                           |
| <i>Proteobacteria</i> | <i>Gammaproteobacteria</i> | <i>Pseudomonadales</i>   | <i>Pseudomonadaceae</i>   | <i>Pseudomonas aeruginosa</i> PAO1                                          |
| <i>Proteobacteria</i> | <i>Gammaproteobacteria</i> | <i>Pseudomonadales</i>   | <i>Pseudomonadaceae</i>   | <i>Pseudomonas aeruginosa</i> UCBPP-PA14                                    |
| <i>Proteobacteria</i> | <i>Gammaproteobacteria</i> | <i>Pseudomonadales</i>   | <i>Pseudomonadaceae</i>   | <i>Pseudomonas entomophila</i> L48                                          |
| <i>Proteobacteria</i> | <i>Gammaproteobacteria</i> | <i>Pseudomonadales</i>   | <i>Pseudomonadaceae</i>   | <i>Pseudomonas fluorescens</i> Pf-5                                         |



|                       |                            |                                            |                            |                                                                             |
|-----------------------|----------------------------|--------------------------------------------|----------------------------|-----------------------------------------------------------------------------|
| <i>Proteobacteria</i> | <i>Gammaproteobacteria</i> | <i>Pseudomonadales</i>                     | <i>Pseudomonadaceae</i>    | <i>Pseudomonas fluorescens</i> PfO-1                                        |
| <i>Proteobacteria</i> | <i>Gammaproteobacteria</i> | <i>Pseudomonadales</i>                     | <i>Pseudomonadaceae</i>    | <i>Pseudomonas mendocina</i> ymp                                            |
| <i>Proteobacteria</i> | <i>Gammaproteobacteria</i> | <i>Pseudomonadales</i>                     | <i>Pseudomonadaceae</i>    | <i>Pseudomonas putida</i> F1                                                |
| <i>Proteobacteria</i> | <i>Gammaproteobacteria</i> | <i>Pseudomonadales</i>                     | <i>Pseudomonadaceae</i>    | <i>Pseudomonas putida</i> KT2440                                            |
| <i>Proteobacteria</i> | <i>Gammaproteobacteria</i> | <i>Pseudomonadales</i>                     | <i>Pseudomonadaceae</i>    | <i>Pseudomonas stutzeri</i> A1501                                           |
| <i>Proteobacteria</i> | <i>Gammaproteobacteria</i> | <i>Pseudomonadales</i>                     | <i>Pseudomonadaceae</i>    | <i>Pseudomonas syringae</i> pv. phaseolicola 1448A                          |
| <i>Proteobacteria</i> | <i>Gammaproteobacteria</i> | <i>Pseudomonadales</i>                     | <i>Pseudomonadaceae</i>    | <i>Pseudomonas syringae</i> pv. syringae B728a                              |
| <i>Proteobacteria</i> | <i>Gammaproteobacteria</i> | <i>Pseudomonadales</i>                     | <i>Pseudomonadaceae</i>    | <i>Pseudomonas syringae</i> pv. tomato str. DC3000                          |
| <i>Proteobacteria</i> | <i>Gammaproteobacteria</i> | <i>Thiotrichales</i>                       | <i>Francisellaceae</i>     | <i>Francisella novicida</i> U112                                            |
| <i>Proteobacteria</i> | <i>Gammaproteobacteria</i> | <i>Thiotrichales</i>                       | <i>Francisellaceae</i>     | <i>Francisella tularensis</i> subsp. holarctica                             |
| <i>Proteobacteria</i> | <i>Gammaproteobacteria</i> | <i>Thiotrichales</i>                       | <i>Francisellaceae</i>     | <i>Francisella tularensis</i> subsp. holarctica FTNF002-00                  |
| <i>Proteobacteria</i> | <i>Gammaproteobacteria</i> | <i>Thiotrichales</i>                       | <i>Francisellaceae</i>     | <i>Francisella tularensis</i> subsp. holarctica OSU18                       |
| <i>Proteobacteria</i> | <i>Gammaproteobacteria</i> | <i>Thiotrichales</i>                       | <i>Francisellaceae</i>     | <i>Francisella tularensis</i> subsp. tularensis FSC198                      |
| <i>Proteobacteria</i> | <i>Gammaproteobacteria</i> | <i>Thiotrichales</i>                       | <i>Francisellaceae</i>     | <i>Francisella tularensis</i> subsp. tularensis SCHU S4                     |
| <i>Proteobacteria</i> | <i>Gammaproteobacteria</i> | <i>Thiotrichales</i>                       | <i>Francisellaceae</i>     | <i>Francisella tularensis</i> subsp. tularensis WY96-3418                   |
| <i>Proteobacteria</i> | <i>Gammaproteobacteria</i> | <i>Thiotrichales</i>                       | <i>Piscirickettsiaceae</i> | <i>Thiomicrospira crunogena</i> XCL-2                                       |
| <i>Proteobacteria</i> | <i>Gammaproteobacteria</i> | unclassified<br><i>Gammaproteobacteria</i> | -                          | <i>Baumannia cicadellinicola</i> str. Hc ( <i>Homalodisca coagulata</i> )   |
| <i>Proteobacteria</i> | <i>Gammaproteobacteria</i> | unclassified<br><i>Gammaproteobacteria</i> | -                          | <i>Candidatus Carsonella ruddii</i> PV                                      |
| <i>Proteobacteria</i> | <i>Gammaproteobacteria</i> | unclassified<br><i>Gammaproteobacteria</i> | -                          | <i>Candidatus Ruthia magnifica</i> str. Cm ( <i>Calyptogena magnifica</i> ) |
| <i>Proteobacteria</i> | <i>Gammaproteobacteria</i> | unclassified<br><i>Gammaproteobacteria</i> | -                          | <i>Candidatus Vesicomysocius okutanii</i> HA                                |
| <i>Proteobacteria</i> | <i>Gammaproteobacteria</i> | <i>Vibrionales</i>                         | <i>Vibrionaceae</i>        | <i>Photobacterium profundum</i> SS9                                         |
| <i>Proteobacteria</i> | <i>Gammaproteobacteria</i> | <i>Vibrionales</i>                         | <i>Vibrionaceae</i>        | <i>Vibrio cholerae</i> O1 biovar El Tor str. N16961                         |
| <i>Proteobacteria</i> | <i>Gammaproteobacteria</i> | <i>Vibrionales</i>                         | <i>Vibrionaceae</i>        | <i>Vibrio cholerae</i> O395                                                 |
| <i>Proteobacteria</i> | <i>Gammaproteobacteria</i> | <i>Vibrionales</i>                         | <i>Vibrionaceae</i>        | <i>Vibrio fischeri</i> ES114                                                |
| <i>Proteobacteria</i> | <i>Gammaproteobacteria</i> | <i>Vibrionales</i>                         | <i>Vibrionaceae</i>        | <i>Vibrio harveyi</i> ATCC BAA-1116                                         |
| <i>Proteobacteria</i> | <i>Gammaproteobacteria</i> | <i>Vibrionales</i>                         | <i>Vibrionaceae</i>        | <i>Vibrio parahaemolyticus</i> RIMD 2210633                                 |
| <i>Proteobacteria</i> | <i>Gammaproteobacteria</i> | <i>Vibrionales</i>                         | <i>Vibrionaceae</i>        | <i>Vibrio vulnificus</i> CMCP6                                              |
| <i>Proteobacteria</i> | <i>Gammaproteobacteria</i> | <i>Vibrionales</i>                         | <i>Vibrionaceae</i>        | <i>Vibrio vulnificus</i> CMCP6                                              |
| <i>Proteobacteria</i> | <i>Gammaproteobacteria</i> | <i>Vibrionales</i>                         | <i>Vibrionaceae</i>        | <i>Vibrio vulnificus</i> YJ016                                              |
| <i>Proteobacteria</i> | <i>Gammaproteobacteria</i> | <i>Xanthomonadales</i>                     | <i>Xanthomonadaceae</i>    | <i>Xanthomonas axonopodis</i> pv. citri str. 306                            |
| <i>Proteobacteria</i> | <i>Gammaproteobacteria</i> | <i>Xanthomonadales</i>                     | <i>Xanthomonadaceae</i>    | <i>Xanthomonas campestris</i> pv. campestris str. 8004                      |

|                       |                                       |                          |                           |                                                                                     |
|-----------------------|---------------------------------------|--------------------------|---------------------------|-------------------------------------------------------------------------------------|
| <i>Proteobacteria</i> | <i>Gammaproteobacteria</i>            | <i>Xanthomonadales</i>   | <i>Xanthomonadaceae</i>   | <i>Xanthomonas campestris</i> pv. <i>campestris</i> str. ATCC 33913                 |
| <i>Proteobacteria</i> | <i>Gammaproteobacteria</i>            | <i>Xanthomonadales</i>   | <i>Xanthomonadaceae</i>   | <i>Xanthomonas campestris</i> pv. <i>vesicatoria</i> str. 85-10                     |
| <i>Proteobacteria</i> | <i>Gammaproteobacteria</i>            | <i>Xanthomonadales</i>   | <i>Xanthomonadaceae</i>   | <i>Xanthomonas oryzae</i> pv. <i>oryzae</i> KACC10331                               |
| <i>Proteobacteria</i> | <i>Gammaproteobacteria</i>            | <i>Xanthomonadales</i>   | <i>Xanthomonadaceae</i>   | <i>Xanthomonas oryzae</i> pv. <i>oryzae</i> MAFF 311018                             |
| <i>Proteobacteria</i> | <i>Gammaproteobacteria</i>            | <i>Xanthomonadales</i>   | <i>Xanthomonadaceae</i>   | <i>Xylella fastidiosa</i> 9a5c                                                      |
| <i>Proteobacteria</i> | <i>Gammaproteobacteria</i>            | <i>Xanthomonadales</i>   | <i>Xanthomonadaceae</i>   | <i>Xylella fastidiosa</i> Temecula1                                                 |
| <i>Proteobacteria</i> | unclassified<br><i>Proteobacteria</i> | -                        | -                         | <i>Magnetococcus</i> sp. MC-1                                                       |
| <i>Spirochaetes</i>   | <i>Spirochaetes</i>                   | <i>Spirochaetales</i>    | <i>Leptospiraceae</i>     | <i>Leptospira borgpetersenii</i> serovar <i>Hardjo-bovis</i> JB197                  |
| <i>Spirochaetes</i>   | <i>Spirochaetes</i>                   | <i>Spirochaetales</i>    | <i>Leptospiraceae</i>     | <i>Leptospira borgpetersenii</i> serovar <i>Hardjo-bovis</i> L550                   |
| <i>Spirochaetes</i>   | <i>Spirochaetes</i>                   | <i>Spirochaetales</i>    | <i>Leptospiraceae</i>     | <i>Leptospira interrogans</i> serovar <i>Copenhageni</i> str. <i>Fiocruz L1-130</i> |
| <i>Spirochaetes</i>   | <i>Spirochaetes</i>                   | <i>Spirochaetales</i>    | <i>Leptospiraceae</i>     | <i>Leptospira interrogans</i> serovar <i>Lai</i> str. 56601                         |
| <i>Spirochaetes</i>   | <i>Spirochaetes</i>                   | <i>Spirochaetales</i>    | <i>Spirochaetaceae</i>    | <i>Borrelia afzelii</i> PKo                                                         |
| <i>Spirochaetes</i>   | <i>Spirochaetes</i>                   | <i>Spirochaetales</i>    | <i>Spirochaetaceae</i>    | <i>Borrelia burgdorferi</i> B31                                                     |
| <i>Spirochaetes</i>   | <i>Spirochaetes</i>                   | <i>Spirochaetales</i>    | <i>Spirochaetaceae</i>    | <i>Borrelia garinii</i> PBi                                                         |
| <i>Spirochaetes</i>   | <i>Spirochaetes</i>                   | <i>Spirochaetales</i>    | <i>Spirochaetaceae</i>    | <i>Borrelia turicatae</i> 91E135                                                    |
| <i>Spirochaetes</i>   | <i>Spirochaetes</i>                   | <i>Spirochaetales</i>    | <i>Spirochaetaceae</i>    | <i>Treponema denticola</i> ATCC 35405                                               |
| <i>Spirochaetes</i>   | <i>Spirochaetes</i>                   | <i>Spirochaetales</i>    | <i>Spirochaetaceae</i>    | <i>Treponema pallidum</i> subsp. <i>pallidum</i> str. <i>Nichols</i>                |
| <i>Tenericutes</i>    | <i>Mollicutes</i>                     | <i>Acholeplasmatales</i> | <i>Acholeplasmataceae</i> | <i>Aster yellows witches'-broom phytoplasma</i> AYWB                                |
| <i>Tenericutes</i>    | <i>Mollicutes</i>                     | <i>Acholeplasmatales</i> | <i>Acholeplasmataceae</i> | <i>Onion yellows phytoplasma</i> OY-M                                               |
| <i>Tenericutes</i>    | <i>Mollicutes</i>                     | <i>Entomoplasmatales</i> | <i>Entomoplasmataceae</i> | <i>Mesoplasma florum</i> L1                                                         |
| <i>Tenericutes</i>    | <i>Mollicutes</i>                     | <i>Mycoplasmatales</i>   | <i>Mycoplasmataceae</i>   | <i>Mycoplasma agalactiae</i> PG2                                                    |
| <i>Tenericutes</i>    | <i>Mollicutes</i>                     | <i>Mycoplasmatales</i>   | <i>Mycoplasmataceae</i>   | <i>Mycoplasma capricolum</i> subsp. <i>capricolum</i> ATCC 27343                    |
| <i>Tenericutes</i>    | <i>Mollicutes</i>                     | <i>Mycoplasmatales</i>   | <i>Mycoplasmataceae</i>   | <i>Mycoplasma gallisepticum</i> R                                                   |
| <i>Tenericutes</i>    | <i>Mollicutes</i>                     | <i>Mycoplasmatales</i>   | <i>Mycoplasmataceae</i>   | <i>Mycoplasma genitalium</i> G37                                                    |
| <i>Tenericutes</i>    | <i>Mollicutes</i>                     | <i>Mycoplasmatales</i>   | <i>Mycoplasmataceae</i>   | <i>Mycoplasma hyopneumoniae</i> 232                                                 |
| <i>Tenericutes</i>    | <i>Mollicutes</i>                     | <i>Mycoplasmatales</i>   | <i>Mycoplasmataceae</i>   | <i>Mycoplasma hyopneumoniae</i> 7448                                                |
| <i>Tenericutes</i>    | <i>Mollicutes</i>                     | <i>Mycoplasmatales</i>   | <i>Mycoplasmataceae</i>   | <i>Mycoplasma hyopneumoniae</i> J                                                   |
| <i>Tenericutes</i>    | <i>Mollicutes</i>                     | <i>Mycoplasmatales</i>   | <i>Mycoplasmataceae</i>   | <i>Mycoplasma mobile</i> 163K                                                       |
| <i>Tenericutes</i>    | <i>Mollicutes</i>                     | <i>Mycoplasmatales</i>   | <i>Mycoplasmataceae</i>   | <i>Mycoplasma mycoides</i> subsp. <i>mycoides</i> SC str. PG1                       |
| <i>Tenericutes</i>    | <i>Mollicutes</i>                     | <i>Mycoplasmatales</i>   | <i>Mycoplasmataceae</i>   | <i>Mycoplasma penetrans</i> HF-2                                                    |
| <i>Tenericutes</i>    | <i>Mollicutes</i>                     | <i>Mycoplasmatales</i>   | <i>Mycoplasmataceae</i>   | <i>Mycoplasma pneumoniae</i> M129                                                   |
| <i>Tenericutes</i>    | <i>Mollicutes</i>                     | <i>Mycoplasmatales</i>   | <i>Mycoplasmataceae</i>   | <i>Mycoplasma pulmonis</i> UAB CTIP                                                 |

|                      |                        |                           |                            |                                                            |
|----------------------|------------------------|---------------------------|----------------------------|------------------------------------------------------------|
| <i>Tenericutes</i>   | <i>Mollicutes</i>      | <i>Mycoplasmatales</i>    | <i>Mycoplasmataceae</i>    | <i>Mycoplasma synoviae</i> 53                              |
| <i>Tenericutes</i>   | <i>Mollicutes</i>      | <i>Mycoplasmatales</i>    | <i>Mycoplasmataceae</i>    | <i>Ureaplasma parvum</i> serovar 3 str. ATCC 700970        |
| <i>Thermotogae</i>   | <i>Thermotogae</i>     | <i>Thermotogales</i>      | <i>Thermotogaceae</i>      | <i>Fervidobacterium nodosum</i> Rt17-B1                    |
| <i>Thermotogae</i>   | <i>Thermotogae</i>     | <i>Thermotogales</i>      | <i>Thermotogaceae</i>      | <i>Thermosipho melanesiensis</i> BI429                     |
| <i>Thermotogae</i>   | <i>Thermotogae</i>     | <i>Thermotogales</i>      | <i>Thermotogaceae</i>      | <i>Thermotoga lettingae</i> TMO                            |
| <i>Thermotogae</i>   | <i>Thermotogae</i>     | <i>Thermotogales</i>      | <i>Thermotogaceae</i>      | <i>Thermotoga maritima</i> MSB8                            |
| <i>Thermotogae</i>   | <i>Thermotogae</i>     | <i>Thermotogales</i>      | <i>Thermotogaceae</i>      | <i>Thermotoga petrophila</i> RKU-1                         |
|                      |                        |                           |                            |                                                            |
|                      |                        |                           |                            |                                                            |
| <b>Phylum</b>        | <b>Class</b>           | <b>Order</b>              | <b>Family</b>              | <b>Microorganism</b>                                       |
| <i>Crenarchaeota</i> | <i>Thermoprotei</i>    | <i>Desulfurococcales</i>  | <i>Desulfurococcaceae</i>  | <i>Aeropyrum pernix</i> K1                                 |
| <i>Crenarchaeota</i> | <i>Thermoprotei</i>    | <i>Desulfurococcales</i>  | <i>Desulfurococcaceae</i>  | <i>Ignicoccus hospitalis</i> KIN4/1                        |
| <i>Crenarchaeota</i> | <i>Thermoprotei</i>    | <i>Desulfurococcales</i>  | <i>Desulfurococcaceae</i>  | <i>Staphylothermus marinus</i> F1                          |
| <i>Crenarchaeota</i> | <i>Thermoprotei</i>    | <i>Desulfurococcales</i>  | <i>Pyrodictiaceae</i>      | <i>Hyperthermus butylicus</i> DSM 5456                     |
| <i>Crenarchaeota</i> | <i>Thermoprotei</i>    | <i>Sulfolobales</i>       | <i>Sulfolobaceae</i>       | <i>Metallosphaera sedula</i> DSM 5348                      |
| <i>Crenarchaeota</i> | <i>Thermoprotei</i>    | <i>Sulfolobales</i>       | <i>Sulfolobaceae</i>       | <i>Sulfolobus acidocaldarius</i> DSM 639                   |
| <i>Crenarchaeota</i> | <i>Thermoprotei</i>    | <i>Sulfolobales</i>       | <i>Sulfolobaceae</i>       | <i>Sulfolobus solfataricus</i> P2                          |
| <i>Crenarchaeota</i> | <i>Thermoprotei</i>    | <i>Sulfolobales</i>       | <i>Sulfolobaceae</i>       | <i>Sulfolobus tokodaii</i> str. 7                          |
| <i>Crenarchaeota</i> | <i>Thermoprotei</i>    | <i>Thermoproteales</i>    | <i>Thermofilaceae</i>      | <i>Thermofilum pendens</i> Hrk 5                           |
| <i>Crenarchaeota</i> | <i>Thermoprotei</i>    | <i>Thermoproteales</i>    | <i>Thermoproteaceae</i>    | <i>Pyrobaculum aerophilum</i> str. IM2                     |
| <i>Crenarchaeota</i> | <i>Thermoprotei</i>    | <i>Thermoproteales</i>    | <i>Thermoproteaceae</i>    | <i>Pyrobaculum arsenaticum</i> DSM 13514                   |
| <i>Crenarchaeota</i> | <i>Thermoprotei</i>    | <i>Thermoproteales</i>    | <i>Thermoproteaceae</i>    | <i>Pyrobaculum calidifontis</i> JCM 11548                  |
| <i>Crenarchaeota</i> | <i>Thermoprotei</i>    | <i>Thermoproteales</i>    | <i>Thermoproteaceae</i>    | <i>Pyrobaculum islandicum</i> DSM 4184                     |
| <i>Euryarchaeota</i> | -                      | -                         | -                          | uncultured methanogenic archaeon RC-1                      |
| <i>Euryarchaeota</i> | <i>Archaeoglobi</i>    | <i>Archaeoglobales</i>    | <i>Archaeoglobaceae</i>    | <i>Archaeoglobus fulgidus</i> DSM 4304                     |
| <i>Euryarchaeota</i> | <i>Halobacteria</i>    | <i>Halobacteriales</i>    | <i>Halobacteriaceae</i>    | <i>Haloarcula marismortui</i> ATCC 43049                   |
| <i>Euryarchaeota</i> | <i>Halobacteria</i>    | <i>Halobacteriales</i>    | <i>Halobacteriaceae</i>    | <i>Halobacterium</i> sp. NRC-1                             |
| <i>Euryarchaeota</i> | <i>Halobacteria</i>    | <i>Halobacteriales</i>    | <i>Halobacteriaceae</i>    | <i>Haloquadratum walsbyi</i> DSM 16790                     |
| <i>Euryarchaeota</i> | <i>Halobacteria</i>    | <i>Halobacteriales</i>    | <i>Halobacteriaceae</i>    | <i>Natronomonas pharaonis</i> DSM 2160                     |
| <i>Euryarchaeota</i> | <i>Methanobacteria</i> | <i>Methanobacteriales</i> | <i>Methanobacteriaceae</i> | <i>Methanobrevibacter smithii</i> ATCC 35061               |
| <i>Euryarchaeota</i> | <i>Methanobacteria</i> | <i>Methanobacteriales</i> | <i>Methanobacteriaceae</i> | <i>Methanosphaera stadtmanae</i> DSM 3091                  |
| <i>Euryarchaeota</i> | <i>Methanobacteria</i> | <i>Methanobacteriales</i> | <i>Methanobacteriaceae</i> | <i>Methanothermobacter thermautotrophicus</i> str. Delta H |

|                      |                          |                           |                                           |                                               |
|----------------------|--------------------------|---------------------------|-------------------------------------------|-----------------------------------------------|
| <i>Euryarchaeota</i> | <i>Methanococci</i>      | <i>Methanococcales</i>    | <i>Methanocaldococcaceae</i>              | <i>Methanocaldococcus jannaschii</i> DSM 2661 |
| <i>Euryarchaeota</i> | <i>Methanococci</i>      | <i>Methanococcales</i>    | <i>Methanococcaceae</i>                   | <i>Methanococcus aeolicus</i> Nankai-3        |
| <i>Euryarchaeota</i> | <i>Methanococci</i>      | <i>Methanococcales</i>    | <i>Methanococcaceae</i>                   | <i>Methanococcus maripaludis</i> C5           |
| <i>Euryarchaeota</i> | <i>Methanococci</i>      | <i>Methanococcales</i>    | <i>Methanococcaceae</i>                   | <i>Methanococcus maripaludis</i> C7           |
| <i>Euryarchaeota</i> | <i>Methanococci</i>      | <i>Methanococcales</i>    | <i>Methanococcaceae</i>                   | <i>Methanococcus maripaludis</i> S2           |
| <i>Euryarchaeota</i> | <i>Methanococci</i>      | <i>Methanococcales</i>    | <i>Methanococcaceae</i>                   | <i>Methanococcus vannielii</i> SB             |
| <i>Euryarchaeota</i> | <i>Methanomicrobia</i>   | <i>Methanomicrobiales</i> | <i>Methanocorpusculaceae</i>              | <i>Methanocorpusculum labreanum</i> Z         |
| <i>Euryarchaeota</i> | <i>Methanomicrobia</i>   | <i>Methanomicrobiales</i> | <i>Methanomicrobiaceae</i>                | <i>Methanoculleus marisnigri</i> JR1          |
| <i>Euryarchaeota</i> | <i>Methanomicrobia</i>   | <i>Methanomicrobiales</i> | <i>Methanospirillaceae</i>                | <i>Methanospirillum hungatei</i> JF-1         |
| <i>Euryarchaeota</i> | <i>Methanomicrobia</i>   | <i>Methanomicrobiales</i> | unclassified<br><i>Methanomicrobiales</i> | <i>Candidatus Methanoregula boonei</i> 6A8    |
| <i>Euryarchaeota</i> | <i>Methanomicrobia</i>   | <i>Methanosarcinales</i>  | <i>Methanosaetaceae</i>                   | <i>Methanosaeta thermophila</i> PT            |
| <i>Euryarchaeota</i> | <i>Methanomicrobia</i>   | <i>Methanosarcinales</i>  | <i>Methanosarcinaceae</i>                 | <i>Methanococcoides burtonii</i> DSM 6242     |
| <i>Euryarchaeota</i> | <i>Methanomicrobia</i>   | <i>Methanosarcinales</i>  | <i>Methanosarcinaceae</i>                 | <i>Methanosarcina acetivorans</i> C2A         |
| <i>Euryarchaeota</i> | <i>Methanomicrobia</i>   | <i>Methanosarcinales</i>  | <i>Methanosarcinaceae</i>                 | <i>Methanosarcina barkeri</i> str. Fusaro     |
| <i>Euryarchaeota</i> | <i>Methanomicrobia</i>   | <i>Methanosarcinales</i>  | <i>Methanosarcinaceae</i>                 | <i>Methanosarcina mazei</i> Go1               |
| <i>Euryarchaeota</i> | <i>Methanopyri</i>       | <i>Methanopyrales</i>     | <i>Methanopyraceae</i>                    | <i>Methanopyrus kandleri</i> AV19             |
| <i>Euryarchaeota</i> | <i>Thermococci</i>       | <i>Thermococcales</i>     | <i>Thermococcaceae</i>                    | <i>Pyrococcus abyssi</i> GE5                  |
| <i>Euryarchaeota</i> | <i>Thermococci</i>       | <i>Thermococcales</i>     | <i>Thermococcaceae</i>                    | <i>Pyrococcus furiosus</i> DSM 3638           |
| <i>Euryarchaeota</i> | <i>Thermococci</i>       | <i>Thermococcales</i>     | <i>Thermococcaceae</i>                    | <i>Pyrococcus horikoshii</i> OT3              |
| <i>Euryarchaeota</i> | <i>Thermococci</i>       | <i>Thermococcales</i>     | <i>Thermococcaceae</i>                    | <i>Thermococcus kodakarensis</i> KOD1         |
| <i>Euryarchaeota</i> | <i>Thermoplasmata</i>    | <i>Thermoplasmatales</i>  | <i>Picrophilaceae</i>                     | <i>Picrophilus torridus</i> DSM 9790          |
| <i>Euryarchaeota</i> | <i>Thermoplasmata</i>    | <i>Thermoplasmatales</i>  | <i>Thermoplasmataceae</i>                 | <i>Thermoplasma acidophilum</i> DSM 1728      |
| <i>Euryarchaeota</i> | <i>Thermoplasmata</i>    | <i>Thermoplasmatales</i>  | <i>Thermoplasmataceae</i>                 | <i>Thermoplasma volcanium</i> GSS1            |
| <i>Nanoarchaeota</i> | -                        | -                         | -                                         | <i>Nanoarchaeum equitans</i> Kin4-M           |
|                      |                          |                           |                                           |                                               |
|                      |                          |                           |                                           |                                               |
| <b>Phylum</b>        | <b>Class</b>             | <b>Order</b>              | <b>Familly</b>                            | <b>Microorganism</b>                          |
| -                    | <i>Cryptophyta</i>       | -                         | <i>Cryptomonadaceae</i>                   | <i>Guillardia theta</i>                       |
| <i>Alveolata</i> *   | <i>Oligohymenophorea</i> | <i>Peniculida</i>         | <i>Parameciidae</i>                       | <i>Paramecium tetraurelia</i> strain d4-2     |
| <i>Amoebozoa</i> *   | -                        | <i>Dictyosteliida</i>     | -                                         | <i>Dictyostelium discoideum</i> AX4           |
| <i>Apicomplexa</i>   | <i>Aconoidasida</i>      | -                         | <i>Theileriidae</i>                       | <i>Theileria annulata</i> strain Ankara       |
| <i>Apicomplexa</i>   | <i>Aconoidasida</i>      | -                         | <i>Theileriidae</i>                       | <i>Theileria parva</i> strain Muguga          |

|               |                       |                         |                          |                                                               |
|---------------|-----------------------|-------------------------|--------------------------|---------------------------------------------------------------|
| Apicomplexa   | Aconoidasida          | Haemosporida            | -                        | <i>Plasmodium falciparum</i> 3D7                              |
| Apicomplexa   | Coccidia              | Eucoccidiorida          | Cryptosporidiidae        | <i>Cryptosporidium parvum</i> Iowa II                         |
| Apicomplexa   | Coccidia              | Eucoccidiorida          | Eimeriidae               | <i>Eimeria tenella</i> str. Houghton                          |
| Arthropoda    | Insecta               | Coleoptera              | Tenebrionidae            | <i>Tribolium castaneum</i>                                    |
| Arthropoda    | Insecta               | Diptera                 | Culicidae                | <i>Anopheles gambiae</i> str. PEST                            |
| Arthropoda    | Insecta               | Diptera                 | Drosophilidae            | <i>Drosophila melanogaster</i>                                |
| Arthropoda    | Insecta               | Diptera                 | Drosophilidae            | <i>Drosophila pseudoobscura pseudoobscura</i>                 |
| Arthropoda    | Insecta               | Hymenoptera             | Apidae                   | <i>Apis mellifera</i>                                         |
| Ascomycota    | Eurotiomycetes        | Eurotiales              | Trichocomaceae           | <i>Aspergillus fumigatus</i> Af293                            |
| Ascomycota    | Eurotiomycetes        | Eurotiales              | Trichocomaceae           | <i>Aspergillus nidulans</i> FGSC A4 *                         |
| Ascomycota    | Eurotiomycetes        | Eurotiales              | Trichocomaceae           | <i>Aspergillus niger</i> CBS 513.88                           |
| Ascomycota    | Eurotiomycetes        | Eurotiales              | Trichocomaceae           | <i>Aspergillus terreus</i> NIH2624                            |
| Ascomycota    | Saccharomycetes       | Saccharomycetales       | -                        | <i>Candida albicans</i> SC5314                                |
| Ascomycota    | Saccharomycetes       | Saccharomycetales       | -                        | <i>Candida glabrata</i> CBS 138                               |
| Ascomycota    | Saccharomycetes       | Saccharomycetales       | Dipodascaceae            | <i>Yarrowia lipolytica</i> CLIB122                            |
| Ascomycota    | Saccharomycetes       | Saccharomycetales       | Saccharomycetaceae       | <i>Ashbya gossypii</i> ATCC 10895                             |
| Ascomycota    | Saccharomycetes       | Saccharomycetales       | Saccharomycetaceae       | <i>Debaryomyces hansenii</i> CBS767                           |
| Ascomycota    | Saccharomycetes       | Saccharomycetales       | Saccharomycetaceae       | <i>Kluyveromyces lactis</i> NRRL Y-1140                       |
| Ascomycota    | Saccharomycetes       | Saccharomycetales       | Saccharomycetaceae       | <i>Pichia stipitis</i> CBS 6054                               |
| Ascomycota    | Saccharomycetes       | Saccharomycetales       | Saccharomycetaceae       | <i>Saccharomyces cerevisiae</i>                               |
| Ascomycota    | Schizosaccharomycetes | Schizosaccharomycetales | Schizosaccharomycetaceae | <i>Schizosaccharomyces pombe</i>                              |
| Ascomycota    | Sordariomycetes       | -                       | Magnaporthaceae          | <i>Magnaporthe grisea</i> 70-15                               |
| Ascomycota    | Sordariomycetes       | Hypocreales             | Nectriaceae              | <i>Gibberella zeae</i> PH-1                                   |
| Ascomycota    | Sordariomycetes       | Sordariales             | Chaetomiaceae            | <i>Chaetomium globosum</i> CBS 148.51                         |
| Ascomycota    | Sordariomycetes       | Sordariales             | Sordariaceae             | <i>Neurospora crassa</i> OR74A                                |
| Basidiomycota | Tremellomycetes       | Tremellales             | Tremellaceae             | <i>Cryptococcus neoformans</i> var. <i>neoformans</i> B-3501A |
| Basidiomycota | Tremellomycetes       | Tremellales             | Tremellaceae             | <i>Cryptococcus neoformans</i> var. <i>neoformans</i> JEC21   |
| Basidiomycota | Ustilaginomycetes     | Ustilaginales           | Ustilaginaceae           | <i>Ustilago maydis</i> 521                                    |
| Chlorophyta   | Prasinophyceae        | Mamiellales             | -                        | <i>Ostreococcus lucimarinus</i> CCE9901                       |
| Chordata      | Actinopterygii        | Cypriniformes           | Cyprinidae               | <i>Danio rerio</i>                                            |
| Chordata      | Aves                  | Galliformes             | Phasianidae              | <i>Gallus gallus</i>                                          |
| Chordata      | Mammalia              | -                       | Bovidae                  | <i>Bos taurus</i>                                             |

|                      |                    |                        |                          |                                                 |
|----------------------|--------------------|------------------------|--------------------------|-------------------------------------------------|
| <i>Chordata</i>      | <i>Mammalia</i>    | <i>Carnivora</i>       | <i>Canidae</i>           | <i>Canis lupus familiaris</i>                   |
| <i>Chordata</i>      | <i>Mammalia</i>    | <i>Didelphimorphia</i> | <i>Didelphidae</i>       | <i>Monodelphis domestica</i>                    |
| <i>Chordata</i>      | <i>Mammalia</i>    | <i>Monotremata</i>     | <i>Ornithorhynchidae</i> | <i>Ornithorhynchus anatinus</i>                 |
| <i>Chordata</i>      | <i>Mammalia</i>    | <i>Perissodactyla</i>  | <i>Equidae</i>           | <i>Equus caballus</i>                           |
| <i>Chordata</i>      | <i>Mammalia</i>    | <i>Primates</i>        | <i>Cercopithecidae</i>   | <i>Macaca mulatta</i>                           |
| <i>Chordata</i>      | <i>Mammalia</i>    | <i>Primates</i>        | <i>Hominidae</i>         | <i>Homo sapiens</i>                             |
| <i>Chordata</i>      | <i>Mammalia</i>    | <i>Primates</i>        | <i>Hominidae</i>         | <i>Pan troglodytes</i>                          |
| <i>Chordata</i>      | <i>Mammalia</i>    | <i>Primates</i>        | <i>Hominidae</i>         | <i>Pan troglodytes verus</i>                    |
| <i>Chordata</i>      | <i>Mammalia</i>    | <i>Rodentia</i>        | <i>Muridae</i>           | <i>Mus musculus</i>                             |
| <i>Chordata</i>      | <i>Mammalia</i>    | <i>Rodentia</i>        | <i>Muridae</i>           | <i>Rattus norvegicus</i>                        |
| <i>Euglenozoa</i> *  | -                  | <i>Kinetoplastida</i>  | <i>Trypanosomatidae</i>  | <i>Leishmania braziliensis</i> MHOM/BR/75/M2904 |
| <i>Euglenozoa</i> *  | -                  | <i>Kinetoplastida</i>  | <i>Trypanosomatidae</i>  | <i>Leishmania infantum</i> JPCM5                |
| <i>Euglenozoa</i> *  | -                  | <i>Kinetoplastida</i>  | <i>Trypanosomatidae</i>  | <i>Leishmania major</i> strain Friedlin         |
| <i>Euglenozoa</i> *  | -                  | <i>Kinetoplastida</i>  | <i>Trypanosomatidae</i>  | <i>Trypanosoma brucei</i> TREU927               |
| <i>Microsporidia</i> | -                  | -                      | <i>Unikaryonidae</i>     | <i>Encephalitozoon cuniculi</i> GB-M1           |
| <i>Nematoda</i>      | <i>Chromadorea</i> | <i>Rhabditida</i>      | <i>Rhabditidae</i>       | <i>Caenorhabditis briggsae</i> AF16             |
| <i>Nematoda</i>      | <i>Chromadorea</i> | <i>Rhabditida</i>      | <i>Rhabditidae</i>       | <i>Caenorhabditis elegans</i>                   |
| <i>Streptophyta</i>  | -                  | <i>Brassicales</i>     | <i>Brassicaceae</i>      | <i>Arabidopsis thaliana</i>                     |
| <i>Streptophyta</i>  | -                  | <i>Malpighiales</i>    | <i>Salicaceae</i>        | <i>Populus trichocarpa</i>                      |
| <i>Streptophyta</i>  | <i>Liliopsida</i>  | <i>Poales</i>          | <i>Poaceae</i>           | <i>Oryza sativa</i> Japonica Group              |

<sup>1</sup>: Strains harbouring *xfp* genes are indicated in red.

\*: Strains harbouring *xfp* genes excluded from the analysis
